# Supplementary material for: Halogen bonding in cadmium(ii) MOFs: its influence on the structure and on the nitroaldol reaction in aqueous medium
Source: Royal Society of Chemistry journal article supplement (doi:10.1039/d1dt03755b), 2021-12-08
Supplement: d1dt03755b1.pdf [file d1dt03755b1.pdf]

## Electronic Supplementary Information (ESI)

belonging to the article

### Halogen bonding in cadmium(II) MOFs: influence on the structure and on the nitroaldol reaction in aqueous medium

Atash V. Gurbanov,<sup>\*a,b</sup> Maxim L. Kuznetsov,<sup>\*a</sup> Anirban Karmakar,<sup>\*a</sup> Vusala A. Aliyeva,<sup>a</sup>  
Kamran T. Mahmudov<sup>\*a,b</sup> and Armando J. L. Pombeiro <sup>\*a,c</sup>

---

<sup>a</sup> Centro de Química Estrutural, Instituto Superior Técnico, Universidade de Lisboa, Av. Rovisco Pais, 1049-001 Lisboa, Portugal. E-mail: [max@mail.ist.utl.pt](mailto:max@mail.ist.utl.pt); [anirban.karmakar@tecnico.ulisboa.pt](mailto:anirban.karmakar@tecnico.ulisboa.pt); [pombeiro@tecnico.ulisboa.pt](mailto:pombeiro@tecnico.ulisboa.pt)

<sup>b</sup> Department of Chemistry, Baku State University, Z. Xalilov Str. 23, Az 1148 Baku, Azerbaijan. E-mail: [organik10@hotmail.com](mailto:organik10@hotmail.com); [kamran.mahmudov@tecnico.ulisboa.pt](mailto:kamran.mahmudov@tecnico.ulisboa.pt)

<sup>c</sup> Peoples' Friendship University of Russia (RUDN University), Research Institute of Chemistry, 6 Miklukho-Maklaya St, Moscow, 117198, Russian Federation

---

## Computational models

The structures of all model clusters (Fig. S2) were taken from the experimental X-ray structures of **3** or **4**. In **5N3<sub>1...1</sub>**, the chains were terminated by the benzoate ligands in the units A, C and D. In the units C, D and E, the iodine atoms and carboxylate groups of the H<sub>3</sub>L<sup>3</sup> ligand were substituted by the hydrogen atoms and the pyrimidine moiety was substituted by the propenyl one.

In **2N3<sub>1...1</sub>**, in the unit A, the chain was terminated by two acetate ligands and one of the carboxylate groups of H<sub>3</sub>L<sup>3</sup> was replaced by the COOH group. In the unit B, the chain was terminated by one acetate ligand and two carboxylate groups of H<sub>3</sub>L<sup>3</sup> were replaced by the COOH groups.

In **2N4<sub>1...1</sub>**, in the unit A, one H<sub>2</sub>L<sup>4</sup> ligand was replaced by the acetate ligand, one  $\mu$ -H<sub>2</sub>L<sup>4</sup> ligand was replaced by the acetic acid and one  $\mu$ -H<sub>2</sub>L<sup>4</sup> ligand was replaced by the H<sub>3</sub>L<sup>4</sup> one. In the unit B, one H<sub>2</sub>L<sup>4</sup> ligand was replaced by the acetate ligand and two  $\mu$ -H<sub>2</sub>L<sup>4</sup> ligands were replaced by the acetic acid molecules.

In **3N3<sub>1...0</sub>**, in the unit A, two H<sub>3</sub>L<sup>3</sup> ligands were substituted by the acetate ligands. In the third ligand, one of the carboxylate groups was replaced for the COOH group. In the unit B, one H<sub>3</sub>L<sup>3</sup> ligand was substituted by the acetate ligand and in another ligand, two I atoms were replaced for two H atoms. In the unit C, two H<sub>3</sub>L<sup>3</sup> ligands were substituted by the acetate ligands and in the third ligand, triiododicarboxylatophenyl moiety was replaced for the iodovinyl one.

In **2N4<sub>1...0</sub>**, in both units A and B, two H<sub>2</sub>L<sup>4</sup> ligands were replaced by the acetate ligands, one  $\mu$ -H<sub>2</sub>L<sup>4</sup> ligand was replaced by the acetic acid and one  $\mu$ -H<sub>2</sub>L<sup>4</sup> ligand was replaced by the H<sub>3</sub>L<sup>4</sup> one.

The C–H and O–H bond lengths were fixed at their idealized values of 1.09 and 1.00 Å, respectively in all clusters. Atomic coordinates are given in Table S1.

## Calculations of the interaction energies

Because of the rigid structures of complexes and existence of the multiple intermolecular interactions, the direct calculations of the interaction energies are not possible. Therefore, the following procedures were applied to estimate  $E_{\text{int}}$  values.

The  $E_{\text{int}}$  of the I $\cdots$ I bond in **2N3<sub>1...1</sub>** ( $E_{\text{int}}(\mathbf{2N3}_{1...1})$ ) was estimated as the total energy difference between the structures **2N3<sub>1...1</sub>M2** and **2N3<sub>1...1</sub>M1**. In **2N3<sub>1...1</sub>M1**, one of the I atoms forming the I $\cdots$ I bond was replaced with the hydrogen atom while, in **2N3<sub>1...1</sub>M2**, one of the non-interacting I atoms was replaced for H (Fig. S4). The C–H bond was fixed at 1.09 Å.

The  $E_{\text{int}}$  of the I $\cdots$ I bonds in **2N4<sub>1...1</sub>** were estimated using the following equations:

$$E_{\text{int}}(\mathbf{2N4}_{11...15}) = [(E_{M4} - E_{M2}) + (E_{M4} - E_{M3}) - (E_{M4} - E_{M1})]/2$$

$$E_{\text{int}}(\mathbf{2N4}_{15...15'}) = [(E_{M4} - E_{M1}) + (E_{M4} - E_{M3}) - (E_{M4} - E_{M2})]/2$$

$$E_{\text{int}}(\mathbf{2N4}_{11...15'}) = [(E_{M4} - E_{M1}) + (E_{M4} - E_{M2}) - (E_{M4} - E_{M3})]/2$$

where  $E_{M1}$ ,  $E_{M2}$ ,  $E_{M3}$  and  $E_{M4}$  are total energies of the model structures **2N4<sub>1...1</sub>M1**, **2N4<sub>1...1</sub>M2**, **2N4<sub>1...1</sub>M3** and **2N4<sub>1...1</sub>M4** (Fig. S4). In **2N4<sub>1...1</sub>M1**, **2N4<sub>1...1</sub>M2** and **2N4<sub>1...1</sub>M3**, one of the interacting atoms (I5', I1 and I5, respectively) was substituted for the H atom. In **2N4<sub>1...1</sub>M4**, one of the non-interacting I atoms was substituted for the H atom. The C–H bonds were fixed at 1.09 Å.

The  $E_{\text{int}}$  of the  $\text{I}\cdots\text{O}$  bond in  $3\text{N}3_{\text{I}\cdots\text{O}}$  was estimated as  $E_{\text{int}}(3\text{N}3_{\text{I}\cdots\text{O}}) = E(3\text{N}3_{\text{I}\cdots\text{O}}\text{M}2) - E(3\text{N}3_{\text{I}\cdots\text{O}}\text{M}1) + E_{\text{int}}(2\text{N}3_{\text{I}\cdots\text{I}})$ , where  $E(3\text{N}3_{\text{I}\cdots\text{O}}\text{M}1)$  and  $E(3\text{N}3_{\text{I}\cdots\text{O}}\text{M}2)$  are total energies of model structures  $3\text{N}3_{\text{I}\cdots\text{O}}\text{M}1$  and  $3\text{N}3_{\text{I}\cdots\text{O}}\text{M}2$  (Fig. S4). Addition of the  $E_{\text{int}}(2\text{N}3_{\text{I}\cdots\text{I}})$  term is accounted for by the existence of the  $\text{I}\cdots\text{I}$  interaction in structure  $3\text{N}3_{\text{I}\cdots\text{O}}\text{M}1$ . Structures  $3\text{N}3_{\text{I}\cdots\text{O}}\text{M}1$  and  $3\text{N}3_{\text{I}\cdots\text{O}}\text{M}2$  were constructed by substitution of the I atom participating in the  $\text{I}\cdots\text{O}$  interaction ( $3\text{N}3_{\text{I}\cdots\text{O}}\text{M}1$ ) or another non-coordinated I atom ( $3\text{N}3_{\text{I}\cdots\text{O}}\text{M}2$ ) by the H atom. The C–H bond was fixed at 1.09 Å.

The  $E_{\text{int}}$  of the  $\text{I}\cdots\text{O}$  bond in  $2\text{N}4_{\text{I}\cdots\text{O}}$  was estimated as  $E_{\text{int}}(2\text{N}4_{\text{I}\cdots\text{O}}) = E(2\text{N}4_{\text{I}\cdots\text{O}}\text{M}2) - E(2\text{N}4_{\text{I}\cdots\text{O}}\text{M}1)$ , where  $E(2\text{N}4_{\text{I}\cdots\text{O}}\text{M}1)$  and  $E(2\text{N}4_{\text{I}\cdots\text{O}}\text{M}2)$  are total energies of model structures  $2\text{N}4_{\text{I}\cdots\text{O}}\text{M}1$  and  $2\text{N}4_{\text{I}\cdots\text{O}}\text{M}2$  (Fig. S4). Structures  $2\text{N}4_{\text{I}\cdots\text{O}}\text{M}1$  and  $2\text{N}4_{\text{I}\cdots\text{O}}\text{M}2$  were constructed by substitution of the I atoms participating in the  $\text{I}\cdots\text{O}$  interactions ( $2\text{N}4_{\text{I}\cdots\text{O}}\text{M}1$ ) or another two non-coordinated I atoms ( $2\text{N}4_{\text{I}\cdots\text{O}}\text{M}2$ ) by the H atom. The C–H bond was fixed at 1.09 Å.

### Initial geometry and optimization of $3_{\text{M}}$

In the model structure  $3_{\text{M}}$ , two fragments A and B are not directly connected via the  $-\text{CO}_2$  bridge and they are bound only through the  $\text{I}\cdots\text{I}$  interaction. Initial geometry of  $3_{\text{M}}$  was constructed from the structure of  $2\text{N}3_{\text{I}\cdots\text{I}}$  through the following steps: 1) elimination of the  $\{\text{CdAc}_2\}$  moiety in fragment A, 2) cleavage of the C1–C2 bond, 3) rotation around the  $\text{I}1\cdots\text{I}3$  bond, 4) in fragment A, the H atom was placed at the position of the C1 atom and the C–H distance of set to 1.09 Å, 5) in fragment B, the  $\text{CH}_3$  group was places at the position of the C2 atom, 6) reflection of the fragment B relative to the C–I1 $\cdots$ I3 plane (Table S2). Such a construction allowed the disconnection of the fragments A and B through the  $-\text{CO}_2$  bridge meanwhile keeping the  $\text{I}1\cdots\text{I}3$  bond and all other bond and dihedral angles within each fragment A and B unchanged.

Structure of  $3_{\text{M}}$  was partially optimized. All Cd–O, Cd–N and Cd–I bonds as well as the  $\text{I}3\cdots\text{I}1-\text{C}$ , Cd–I $\cdots$ I, one  $\text{I}3-\text{CdC}_{\text{Ac}}$  angles and one  $\text{I}3\text{CdOC}_{\text{Ac}}$  torsion angle were frozen to prevent the formation of other undesired intermolecular interactions during the optimization.

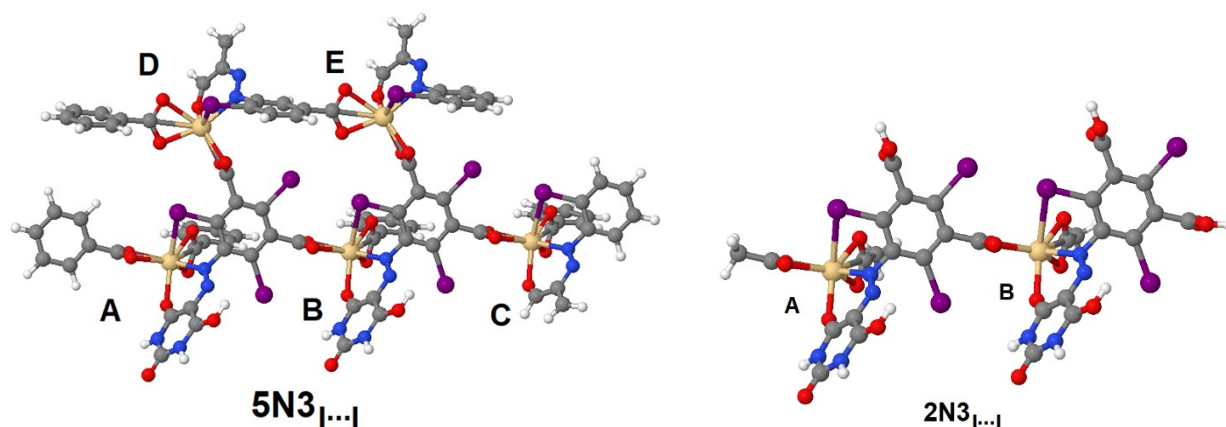

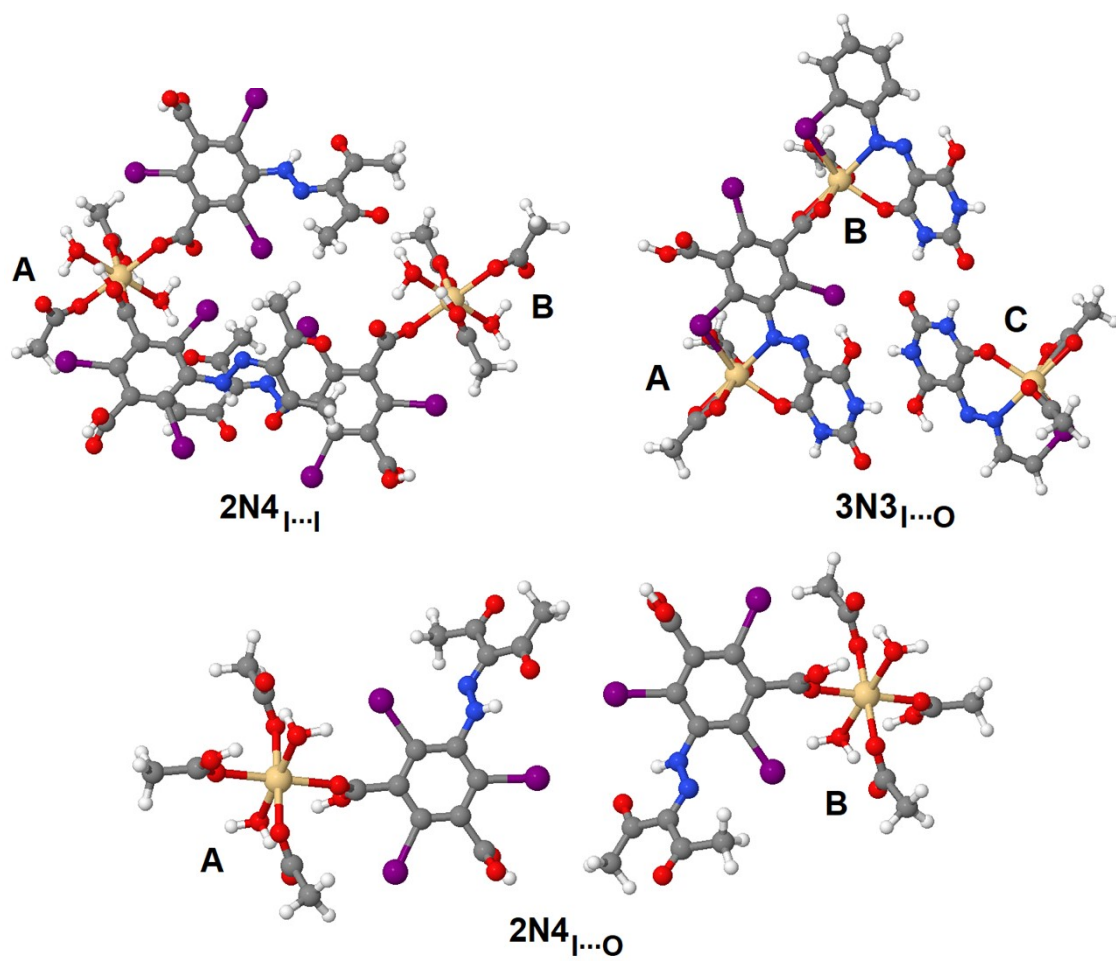

Fig. S1. Computational models.

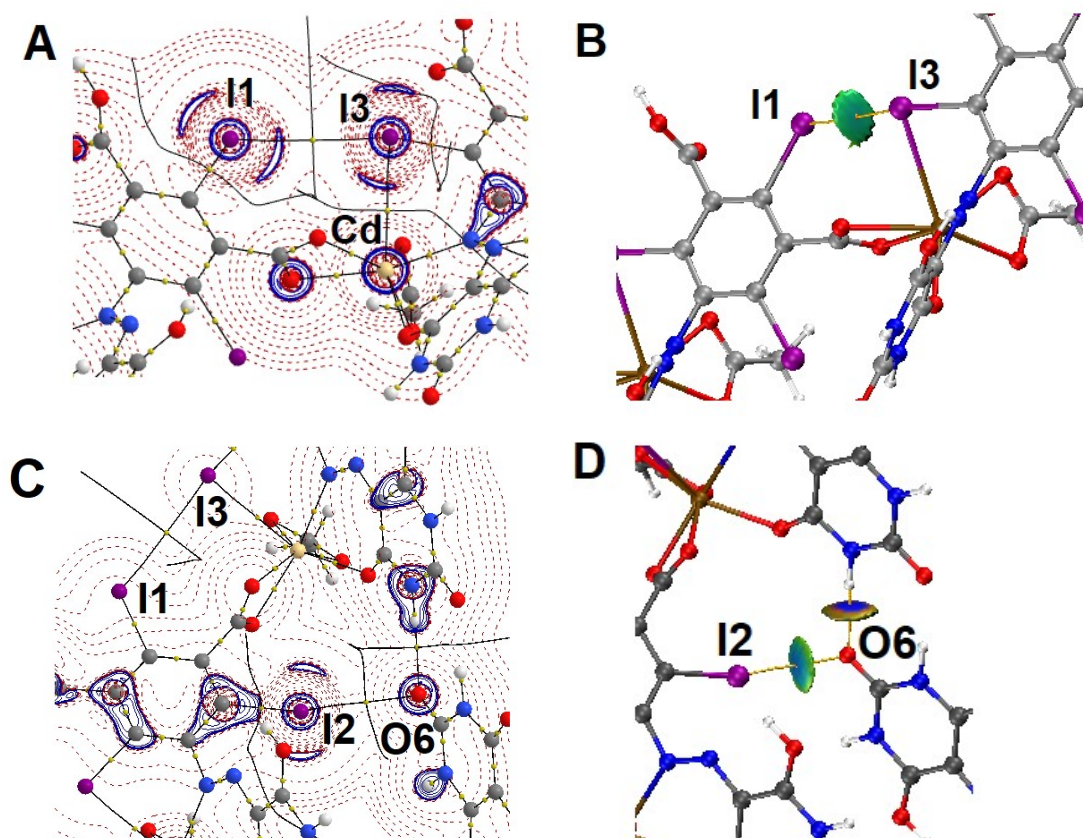

**Fig. S2.** Contour line diagram of the Laplacian distribution  $\nabla^2\rho(r)$  in the plane formed by Cd and interacting I and/or O atoms, selected bond paths, zero flux surfaces (A, C) and the  $\text{sign}(\lambda_2)\rho(r)$  function mapped on the  $\delta g_{\text{inter}}$  isosurface of 0.005 a.u. and blue-cyan-green-yellow-red color scale  $-0.02 < \text{sign}(\lambda_2)\rho(r) < 0.02$  for the I...I and I...O contacts (B, D) for  $2\text{N}3_{\text{I}\cdots\text{I}}$  (A, B) and  $3\text{N}3_{\text{I}\cdots\text{O}}$  (C, D).

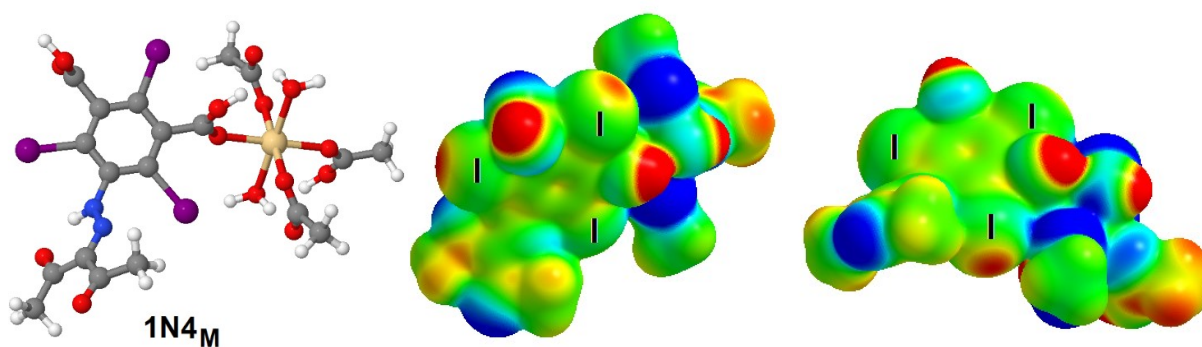

**Fig. S3.** Structure and ESP distribution mapped on the 0.002 a.u. isosurface of electron density for the  $[\text{Cd}(\text{H}_3\text{L}^4)(\text{H}_2\text{O})_2(\text{Ac})_2(\text{HAc})]$  model complex ( $1\text{N}4_{\text{M}}$ ) with blue-cyan-green-yellow-red color scale  $-0.05 < \text{ESP} < 0.05$  a.u.

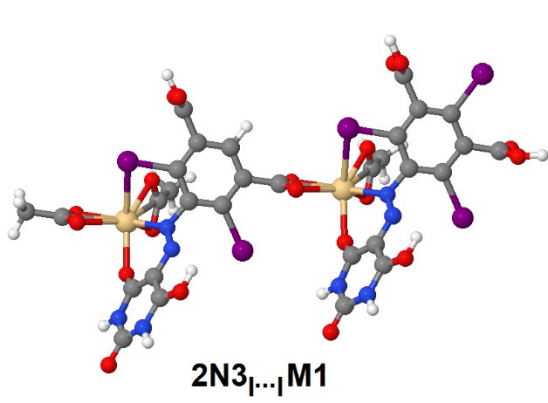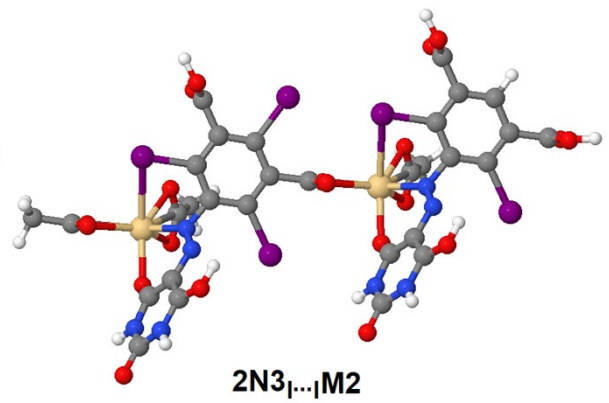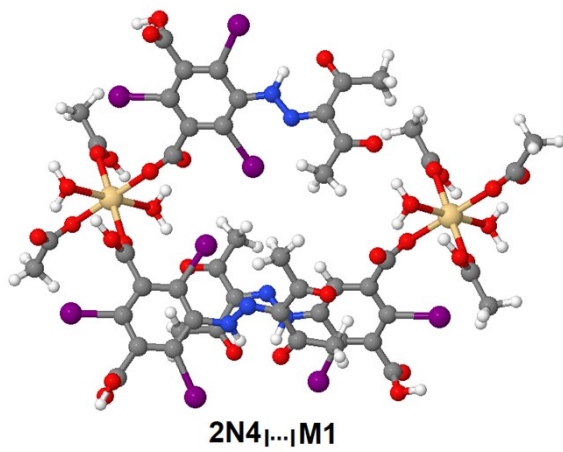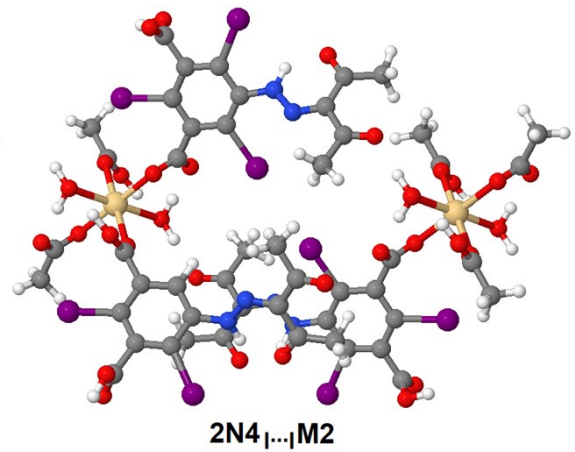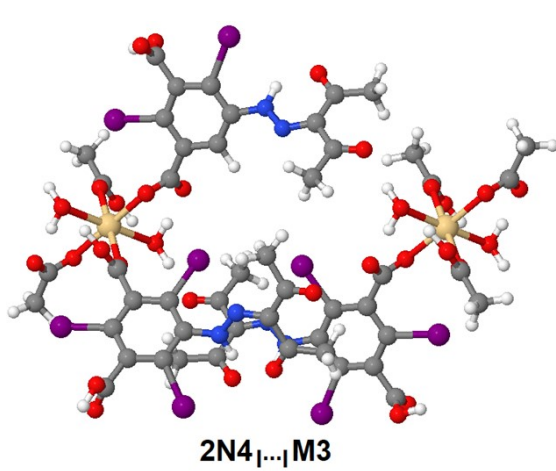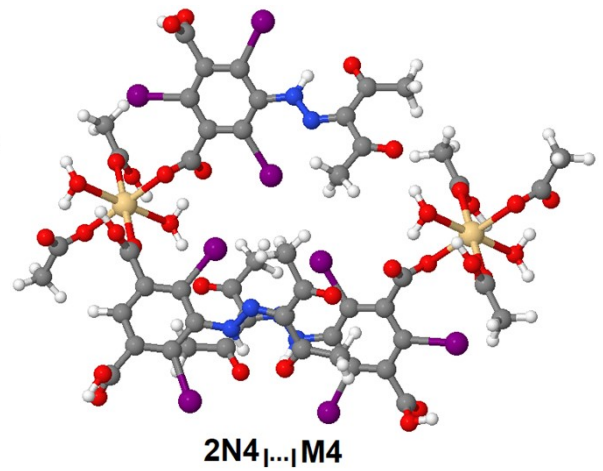

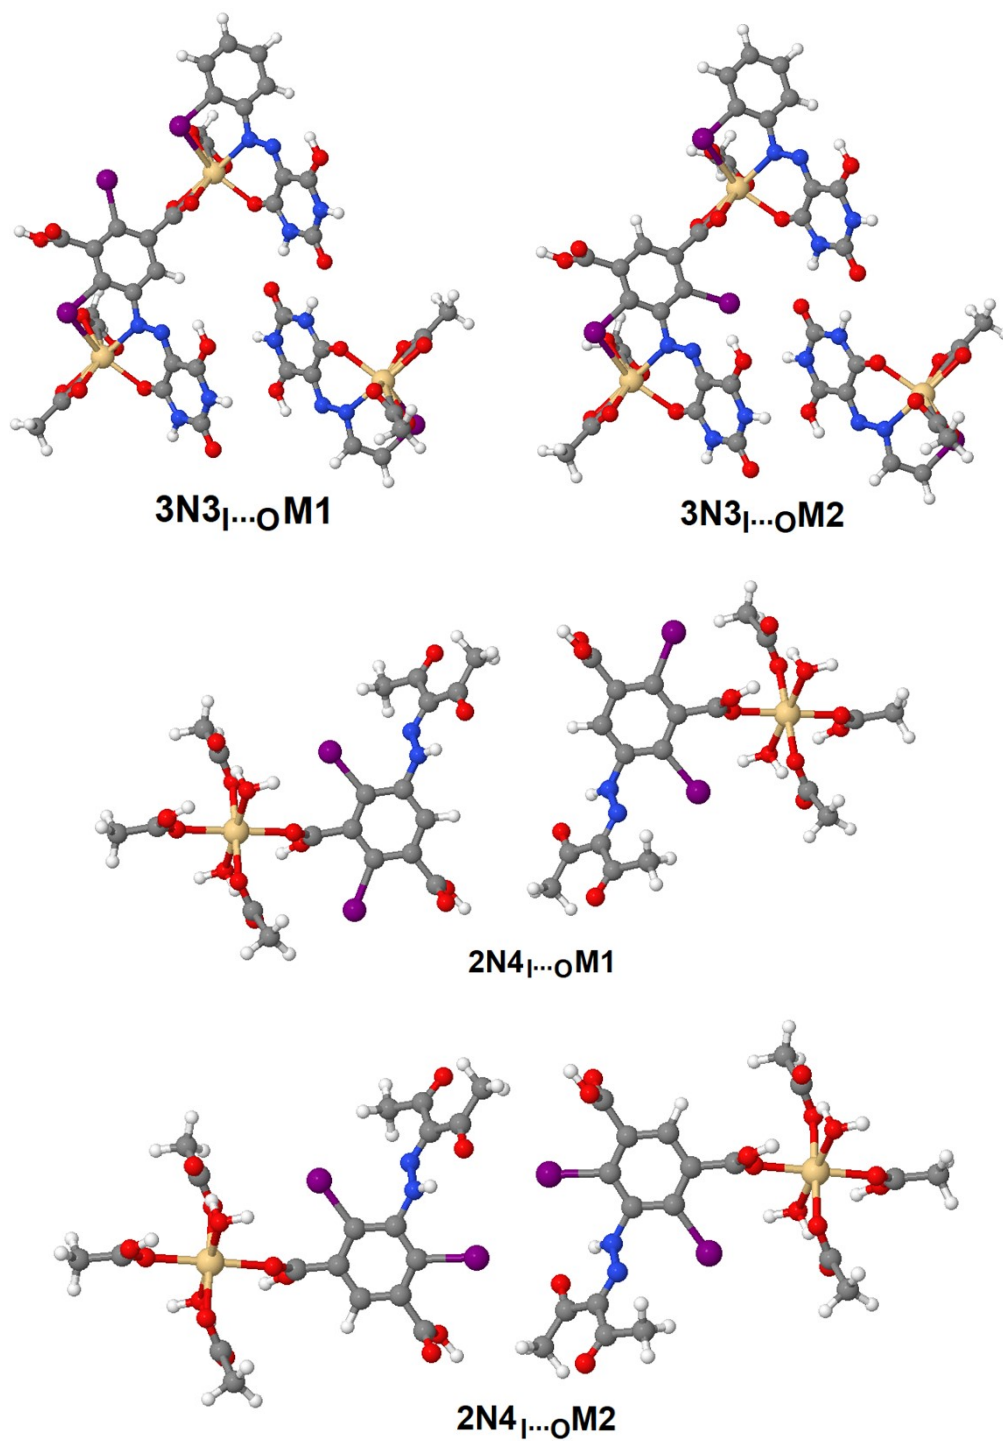

**Fig. S4.** Model structures used for the calculations of interaction energies.

**Table S1.** Calculated electron density,  $\rho_b$ , its Laplacian,  $\nabla^2\rho_b$ , potential and kinetic energy densities,  $V_b$  and  $G_b$ , second eigenvalue of the hessian matrix,  $\lambda_{2,b}$ , ratio of the first and third eigenvalues of the hessian matrix,  $\lambda_{1,b}/\lambda_{3,b}$ , at BCPs (in a.u.), second order NBO perturbation energies,  $E(2)$ , and interaction energies,  $E_{int}$  (in kcal/mol).

|                               | I...I                |                      |                      |                  |          | I...O            |                      |                      |
|-------------------------------|----------------------|----------------------|----------------------|------------------|----------|------------------|----------------------|----------------------|
|                               | 2N3 <sub>I...I</sub> | 5N3 <sub>I...I</sub> | 2N4 <sub>I...I</sub> |                  |          | 3 <sub>M</sub>   | 3M3 <sub>I...O</sub> | 2N4 <sub>I...O</sub> |
|                               |                      |                      | I1...I5              | I5...I5'         | I1...I5' |                  |                      |                      |
| $\rho_b$                      | 0.0086               | 0.0085               | 0.0084               | 0.0063           | 0.0051   | 0.0123           | 0.0124               | 0.0121               |
| $\nabla^2\rho_b$              | 0.0305               | 0.0304               | 0.0291               | 0.0245           | 0.0199   | 0.0395           | 0.0475               | 0.0452               |
| $V_b$                         | -0.0052              | -0.0051              | -0.0049              | -0.0038          | -0.0025  | -0.0082          | -0.0090              | -0.0085              |
| $G_b$                         | 0.0064               | 0.0064               | 0.0061               | 0.0049           | 0.0037   | 0.0090           | 0.0104               | 0.0099               |
| $\lambda_{2,b}$               | -0.0050              | -0.0050              | -0.0046              | -0.0032          | -0.0027  | -0.0071          | -0.0085              | -0.0086              |
| $\lambda_{1,b}/\lambda_{3,b}$ | -0.129               | -0.129               | -0.125               | -0.113           | -0.124   | -0.138           | -0.138               | -0.144               |
| $E(2)$                        | 2.6 <sup>a</sup>     | –                    | 3.5 <sup>a</sup>     | 1.7 <sup>a</sup> | –        | 4.1 <sup>a</sup> | 1.7 <sup>b</sup>     | 1.7 <sup>b</sup>     |
| $E_{int}$                     | -3.2                 | –                    | -2.9                 | -1.3             | -3.7     | -5.4             | -4.7                 | -3.3                 |

<sup>a</sup> For the LP(I)  $\rightarrow$   $\sigma^*(I-C)$  transition(s). <sup>b</sup> Overall for the LP(O)  $\rightarrow$   $\sigma^*(I-C)$  and  $\sigma(O-C) \rightarrow \sigma^*(I-C)$  transitions.

**Table S2.** Cartesian atomic coordinates (in Å) of the calculated structures.

**5N3<sub>I...I</sub>**

|    |          |          |          |
|----|----------|----------|----------|
| Cd | 10.29399 | -1.86492 | -0.05112 |
| I  | 5.83564  | -3.90074 | -0.40757 |
| I  | 1.61510  | -0.26433 | 2.03585  |
| O  | 0.86360  | -4.10366 | -1.02650 |
| O  | 8.17721  | -1.11475 | -0.46468 |
| N  | 2.86115  | -2.78916 | 0.54926  |
| O  | 3.81257  | 2.50117  | 1.66757  |
| O  | 8.36351  | -2.16096 | 1.43248  |
| C  | 5.25327  | -2.16767 | 0.59781  |
| O  | 4.06187  | 1.66926  | 3.65202  |
| C  | 3.59121  | -0.68113 | 1.52990  |
| N  | 0.42457  | -6.17160 | -0.34590 |
| H  | -0.27579 | -6.20214 | -1.05904 |
| N  | 2.99017  | -3.93918 | 1.07311  |
| C  | 6.24833  | -1.22209 | 0.92121  |
| C  | 3.89942  | -1.91337 | 0.93946  |
| O  | -0.10035 | -8.29596 | 0.25730  |
| C  | 4.56609  | 0.27039  | 1.82765  |
| C  | 5.87922  | -0.01532 | 1.51766  |
| C  | 2.14112  | -4.97331 | 0.78592  |
| C  | 1.13199  | -4.99367 | -0.21439 |
| C  | 7.68939  | -1.53642 | 0.60330  |
| C  | 4.15006  | 1.58542  | 2.44442  |
| N  | 1.55658  | -7.24229 | 1.31941  |
| H  | 1.71069  | -8.06174 | 1.87147  |
| C  | 0.59137  | -7.30203 | 0.40717  |
| C  | 2.37082  | -6.14431 | 1.57658  |
| I  | 7.35937  | 1.35931  | 2.09013  |
| O  | 3.25584  | -6.27421 | 2.45894  |
| H  | 3.82301  | -5.45062 | 2.46414  |
| Cd | 1.10078  | -1.89495 | -0.64467 |



|    |           |          |          |
|----|-----------|----------|----------|
| Cd | 2.93614   | 3.79698  | 3.38950  |
| I  | 10.80830  | -0.23428 | 2.62940  |
| O  | 10.05681  | -4.07362 | -0.43293 |
| N  | 12.05436  | -2.75912 | 1.14282  |
| O  | 11.19175  | -1.60870 | -2.18198 |
| O  | 11.47577  | 0.08622  | -0.86337 |
| I  | -3.35757  | -3.93078 | -1.00115 |
| I  | -7.57813  | -0.29436 | 1.44228  |
| O  | -8.32961  | -4.13369 | -1.62006 |
| O  | -1.01600  | -1.14479 | -1.05824 |
| N  | -6.33206  | -2.81920 | -0.04430 |
| O  | -5.38063  | 2.47114  | 1.07403  |
| O  | -0.82969  | -2.19099 | 0.83892  |
| C  | -3.93994  | -2.19771 | 0.00425  |
| O  | -5.13133  | 1.63923  | 3.05846  |
| C  | -5.60201  | -0.71116 | 0.93633  |
| N  | -8.76865  | -6.20163 | -0.93946 |
| H  | -9.46901  | -6.23216 | -1.65260 |
| N  | -6.20304  | -3.96923 | 0.47954  |
| C  | -2.94490  | -1.25211 | 0.32765  |
| C  | -5.29380  | -1.94339 | 0.34591  |
| O  | -9.29354  | -8.32600 | -0.33626 |
| C  | -4.62712  | 0.24034  | 1.23409  |
| C  | -3.31399  | -0.04536 | 0.92409  |
| C  | -7.05209  | -5.00336 | 0.19236  |
| C  | -8.06123  | -5.02371 | -0.80794 |
| C  | -1.50384  | -1.56645 | 0.00974  |
| C  | -5.04313  | 1.55538  | 1.85086  |
| N  | -7.63664  | -7.27234 | 0.72584  |
| H  | -7.48252  | -8.09177 | 1.27790  |
| C  | -8.60184  | -7.33207 | -0.18640 |
| C  | -6.82240  | -6.17434 | 0.98303  |
| I  | -1.83383  | 1.32926  | 1.49657  |
| O  | -5.93736  | -6.30425 | 1.86538  |
| H  | -5.37020  | -5.48066 | 1.87058  |
| Cd | -8.09243  | -1.92500 | -1.23823 |
| Cd | -6.25707  | 3.76693  | 2.79594  |
| O  | 1.99855   | -1.63874 | -2.77555 |
| O  | 2.28257   | 0.05618  | -1.45692 |
| O  | -8.39517  | 2.96507  | 2.79132  |
| O  | -8.16920  | 4.80501  | 3.92799  |
| C  | -11.28383 | 4.47955  | 3.17732  |
| C  | -12.97720 | 3.68847  | 4.70954  |
| C  | -10.31124 | 3.79082  | 3.93135  |
| C  | -12.64142 | 4.46147  | 3.59073  |
| C  | -12.02509 | 2.98247  | 5.44406  |
| C  | -10.70719 | 3.04450  | 5.04243  |
| C  | -8.86476  | 3.87057  | 3.50962  |
| I  | -5.76670  | 3.65603  | 5.93533  |
| O  | -6.43998  | 5.50609  | 1.37387  |
| N  | -4.46626  | 5.08775  | 3.40622  |
| O  | 0.79803   | 2.99512  | 3.38489  |
| O  | 1.02401   | 4.83504  | 4.52155  |

|   |           |          |          |
|---|-----------|----------|----------|
| C | -2.09063  | 4.50958  | 3.77087  |
| C | -3.78400  | 3.71852  | 5.30310  |
| N | -4.30417  | 6.34284  | 3.29634  |
| C | -1.11803  | 3.82086  | 4.52491  |
| C | -3.44822  | 4.49151  | 4.18429  |
| C | -2.83189  | 3.01252  | 6.03762  |
| C | -1.51399  | 3.07454  | 5.63599  |
| C | -5.12829  | 7.12268  | 2.53117  |
| C | -6.14330  | 6.67347  | 1.64386  |
| C | 0.32845   | 3.90061  | 4.10317  |
| I | 3.42652   | 3.68608  | 6.52890  |
| O | 2.75323   | 5.53611  | 1.96742  |
| N | 4.72697   | 5.11779  | 3.99978  |
| O | -10.20921 | -1.17483 | -1.65180 |
| O | -10.02291 | -2.22103 | 0.24536  |
| C | -13.13315 | -2.22775 | -0.58931 |
| C | -14.79522 | -0.74120 | 0.34277  |
| C | -12.13810 | -1.28216 | -0.26591 |
| C | -14.48699 | -1.97344 | -0.24766 |
| C | -13.82033 | 0.21031  | 0.64052  |
| C | -12.50719 | -0.07541 | 0.33052  |
| C | -10.69703 | -1.59650 | -0.58382 |
| O | -7.19467  | -1.66877 | -3.36911 |
| O | -6.91064  | 0.02615  | -2.05049 |
| C | -5.64174  | 1.82819  | -6.59055 |
| C | -7.33511  | 1.03710  | -5.05831 |
| C | -4.66914  | 1.13945  | -5.83652 |
| C | -6.99933  | 1.81009  | -6.17712 |
| C | -6.38301  | 0.33111  | -4.32380 |
| C | -5.06510  | 0.39314  | -4.72542 |
| C | -6.82849  | -0.49816 | -3.14202 |
| C | 7.10259   | 4.53962  | 4.36444  |
| C | 5.40922   | 3.74855  | 5.89667  |
| N | 4.88904   | 6.37287  | 3.88989  |
| C | 8.07518   | 3.85090  | 5.11846  |
| C | 5.74500   | 4.52155  | 4.77786  |
| C | 6.36132   | 3.04256  | 6.63117  |
| C | 7.67923   | 3.10458  | 6.22955  |
| C | 4.06492   | 7.15272  | 3.12472  |
| C | 3.04988   | 6.70350  | 2.23742  |
| C | 12.74468  | 1.88826  | -5.40343 |
| C | 11.05131  | 1.09720  | -3.87119 |
| C | 13.71729  | 1.19953  | -4.64939 |
| C | 11.38709  | 1.87019  | -4.99002 |
| C | 12.00342  | 0.39120  | -3.13669 |
| C | 13.32133  | 0.45321  | -3.53831 |
| C | 11.55791  | -0.43809 | -1.95491 |
| C | 14.44647  | -2.13763 | 1.19138  |
| C | 12.78441  | -0.65108 | 2.12346  |
| N | 12.18337  | -3.90916 | 1.66666  |
| C | 15.44153  | -1.19204 | 1.51477  |
| C | 13.09262  | -1.88331 | 1.53301  |
| C | 13.75930  | 0.30041  | 2.42121  |

|   |           |          |          |
|---|-----------|----------|----------|
| C | 15.07243  | 0.01472  | 2.11122  |
| C | 11.33433  | -4.94328 | 1.37949  |
| C | 10.32519  | -4.96363 | 0.37919  |
| C | 3.55148   | 1.85823  | -5.99699 |
| C | 1.85811   | 1.06716  | -4.46475 |
| C | 4.52407   | 1.16950  | -5.24295 |
| C | 2.19389   | 1.84015  | -5.58358 |
| C | 2.81019   | 0.36116  | -3.73025 |
| C | 4.12811   | 0.42318  | -4.13187 |
| C | 2.36472   | -0.46812 | -2.54846 |
| H | -6.72618  | 7.44776  | 1.14498  |
| C | -4.94929  | 8.53759  | 2.63541  |
| H | -9.95422  | 2.49573  | 5.60811  |
| H | -12.31566 | 2.39533  | 6.31523  |
| H | -14.02154 | 3.63690  | 5.01746  |
| H | -13.39963 | 5.03171  | 3.05400  |
| H | -10.99357 | 5.02451  | 2.27905  |
| H | -12.86309 | -3.15179 | -1.10049 |
| H | -15.26322 | -2.71440 | -0.43889 |
| H | -15.83577 | -0.51780 | 0.57823  |
| H | -14.08980 | 1.15770  | 1.10736  |
| H | -11.73657 | 0.66129  | 0.55749  |
| H | -4.31213  | -0.15562 | -4.15974 |
| H | -3.61753  | 1.18949  | -6.11888 |
| H | -5.35148  | 2.37315  | -7.48881 |
| H | -7.75752  | 2.38033  | -6.71385 |
| H | -8.37944  | 0.98553  | -4.75040 |
| H | 2.46704   | 7.47779  | 1.73855  |
| C | 4.24391   | 8.56764  | 3.22897  |
| H | -3.12244  | 2.42538  | 6.90880  |
| H | -1.80037  | 5.05455  | 2.87262  |
| H | -0.76102  | 2.52577  | 6.20167  |
| H | 4.88108   | -0.12559 | -3.56618 |
| H | 5.57567   | 1.21953  | -5.52531 |
| H | 3.84174   | 2.40320  | -6.89524 |
| H | 1.43569   | 2.41036  | -6.12032 |
| H | 0.81378   | 1.01560  | -4.15682 |
| H | 9.71928   | -5.86794 | 0.32260  |
| C | 11.47758  | -6.12725 | 2.16854  |
| H | 14.71654  | -3.06169 | 0.68022  |
| H | 16.48956  | -1.40172 | 1.30084  |
| H | 15.84306  | 0.75141  | 2.33819  |
| H | 14.07429  | -0.09556 | -2.97263 |
| H | 14.76889  | 1.24958  | -4.93175 |
| H | 13.03494  | 2.43322  | -6.30169 |
| H | 10.62890  | 2.44042  | -5.52674 |
| H | 10.00698  | 1.04563  | -3.56327 |
| H | 13.48985  | 1.24781  | 2.88803  |
| H | 6.07076   | 2.45541  | 7.50234  |
| H | 8.43220   | 2.55582  | 6.79525  |
| H | 9.12679   | 3.90092  | 4.83610  |
| H | 7.39285   | 5.08459  | 3.46618  |
| H | -5.61447  | 9.28906  | 2.21008  |

|   |          |          |         |
|---|----------|----------|---------|
| H | -4.12659 | 9.03139  | 3.15248 |
| H | 3.57874  | 9.31908  | 2.80364 |
| H | 5.06662  | 9.06144  | 3.74604 |
| H | 12.38646 | -6.43126 | 2.68776 |
| H | 10.69482 | -6.86522 | 2.34375 |

### 2N3<sub>I...I</sub>

|    |          |          |          |
|----|----------|----------|----------|
| I  | 6.17508  | -3.26757 | 0.28726  |
| I  | 1.32817  | -3.47629 | 3.95750  |
| O  | 1.36640  | -2.50899 | -0.91549 |
| O  | 8.20189  | -2.06671 | 3.06178  |
| N  | 3.00537  | -3.41309 | 1.25188  |
| O  | 3.25342  | -2.00121 | 6.55174  |
| O  | 8.26026  | -4.24016 | 3.02748  |
| C  | 5.29502  | -3.31448 | 2.17850  |
| O  | 3.34079  | -4.15607 | 6.75478  |
| C  | 3.38433  | -3.34472 | 3.65816  |
| N  | 1.06491  | -4.04408 | -2.49186 |
| H  | 0.46521  | -3.38521 | -2.94600 |
| N  | 3.18797  | -4.41816 | 0.49683  |
| C  | 6.13820  | -3.22203 | 3.30516  |
| C  | 3.89021  | -3.41474 | 2.35385  |
| O  | 0.69413  | -5.53174 | -4.16569 |
| C  | 4.21015  | -3.22561 | 4.77542  |
| C  | 5.57414  | -3.16540 | 4.58067  |
| C  | 2.49365  | -4.59274 | -0.66945 |
| C  | 1.62372  | -3.65645 | -1.29072 |
| C  | 7.63240  | -3.17600 | 3.10081  |
| C  | 3.58597  | -3.13374 | 6.14828  |
| N  | 2.08776  | -6.08234 | -2.51089 |
| H  | 2.25711  | -6.96027 | -2.95876 |
| C  | 1.25439  | -5.24486 | -3.12039 |
| C  | 2.74478  | -5.84944 | -1.30725 |
| I  | 6.82039  | -3.12347 | 6.26983  |
| O  | 3.52252  | -6.74371 | -0.89002 |
| H  | 3.99556  | -6.40053 | -0.07856 |
| Cd | 1.32256  | -1.83454 | 1.23477  |
| I  | -2.82027 | -2.19113 | -1.38408 |
| I  | -7.66720 | -2.39986 | 2.28618  |
| O  | -7.62895 | -1.43257 | -2.58681 |
| O  | -0.79346 | -0.99029 | 1.39045  |
| N  | -5.98998 | -2.33668 | -0.41944 |
| O  | -5.74192 | -0.92481 | 4.88043  |
| O  | -0.73508 | -3.16374 | 1.35616  |
| C  | -3.70033 | -2.23806 | 0.50717  |
| O  | -5.65455 | -3.07965 | 5.08346  |
| C  | -5.61102 | -2.26829 | 1.98683  |
| N  | -7.93045 | -2.96766 | -4.16318 |
| H  | -8.53015 | -2.30878 | -4.61731 |
| N  | -5.80738 | -3.34174 | -1.17451 |
| C  | -2.85717 | -2.14560 | 1.63384  |
| C  | -5.10515 | -2.33832 | 0.68254  |
| O  | -8.30120 | -4.45532 | -5.83701 |
| C  | -4.78520 | -2.14920 | 3.10408  |

|    |           |          |          |
|----|-----------|----------|----------|
| C  | -3.42120  | -2.08898 | 2.90933  |
| C  | -6.50170  | -3.51632 | -2.34079 |
| C  | -7.37164  | -2.58004 | -2.96204 |
| C  | -1.36297  | -2.09958 | 1.42949  |
| C  | -5.40936  | -2.05733 | 4.47696  |
| N  | -6.90760  | -5.00592 | -4.18224 |
| H  | -6.73824  | -5.88384 | -4.63009 |
| C  | -7.74096  | -4.16843 | -4.79172 |
| C  | -6.25058  | -4.77302 | -2.97856 |
| I  | -2.17495  | -2.04705 | 4.59850  |
| O  | -5.47282  | -5.66730 | -2.56135 |
| H  | -4.99979  | -5.32411 | -1.74989 |
| Cd | -7.67279  | -0.75812 | -0.43656 |
| O  | 2.44536   | 0.11152  | 0.63108  |
| O  | 2.38550   | -0.28317 | 2.76013  |
| O  | -9.78881  | 0.08612  | -0.28088 |
| O  | -9.73044  | -2.08732 | -0.31517 |
| C  | -11.85251 | -1.06919 | -0.03749 |
| C  | -10.35830 | -1.02317 | -0.24184 |
| O  | -6.55000  | 1.18794  | -1.04024 |
| O  | -6.60985  | 0.79326  | 1.08880  |
| C  | -5.83977  | 2.91058  | 0.40815  |
| C  | -6.33899  | 1.50876  | 0.14658  |
| C  | 3.15557   | 1.83418  | 2.07948  |
| C  | 2.65636   | 0.43234  | 1.81790  |
| H  | -12.35330 | -1.01172 | -1.00392 |
| H  | -12.16057 | -0.22696 | 0.58205  |
| H  | -12.12300 | -2.00212 | 0.45700  |
| H  | -4.93381  | 2.86672  | 1.01263  |
| H  | -6.60498  | 3.47526  | 0.94076  |
| H  | -5.62041  | 3.40099  | -0.54023 |
| H  | 4.06153   | 1.79032  | 2.68395  |
| H  | 2.39036   | 2.39885  | 2.61209  |
| H  | 3.37492   | 2.32459  | 1.13110  |
| H  | -6.10020  | -3.12784 | 5.97734  |
| H  | 2.89515   | -4.20427 | 7.64866  |
| H  | 9.25574   | -4.32692 | 3.06550  |

**2N4<sub>I...I</sub>**

|    |          |          |          |
|----|----------|----------|----------|
| Cd | 7.05103  | 0.72553  | 0.50643  |
| I  | 6.66856  | -3.34768 | 1.76445  |
| H  | 7.52947  | -0.59230 | -3.01628 |
| I  | 1.31860  | -0.90244 | 0.31703  |
| I  | 1.86588  | -6.87580 | 1.40501  |
| O  | 6.89884  | 0.16252  | -3.19670 |
| O  | 5.01490  | -6.13316 | 3.13271  |
| O  | 6.48581  | 1.58086  | -1.47627 |
| O  | 5.41928  | -0.81299 | 0.10992  |
| O  | 8.70970  | -0.59543 | -0.65939 |
| O  | 4.13097  | -0.25353 | 1.86144  |
| O  | -1.58107 | -5.14146 | 1.65059  |
| N  | -0.22229 | -3.58741 | -0.24497 |
| C  | 6.43660  | 1.22005  | -2.67718 |
| C  | -2.23635 | -3.11378 | -1.34834 |

|    |          |          |          |
|----|----------|----------|----------|
| N  | 0.52656  | -4.11570 | 0.68680  |
| H  | 0.10543  | -4.73382 | 1.35055  |
| C  | 5.73713  | 2.14779  | -3.63842 |
| O  | -3.43662 | -3.07808 | -1.41663 |
| C  | 2.69485  | -4.94262 | 1.17243  |
| O  | 5.31991  | -6.72554 | 1.01025  |
| C  | 4.51031  | -1.04421 | 0.98999  |
| C  | -1.52277 | -3.80423 | -0.25434 |
| C  | 3.86452  | -2.41196 | 0.96362  |
| C  | 2.49581  | -2.60602 | 0.72226  |
| C  | 4.86716  | -5.95940 | 1.92847  |
| C  | -2.23801 | -4.59858 | 0.78722  |
| C  | 4.62131  | -3.52855 | 1.32847  |
| C  | 1.89623  | -3.85142 | 0.79173  |
| C  | 4.04098  | -4.80332 | 1.45244  |
| C  | -1.42352 | -2.35642 | -2.37634 |
| H  | -2.05489 | -2.11259 | -3.23075 |
| H  | -0.58418 | -2.97108 | -2.70161 |
| H  | -1.04771 | -1.43556 | -1.93039 |
| C  | -3.74903 | -4.66368 | 0.82971  |
| H  | -4.06339 | -5.25770 | 1.68787  |
| H  | -4.11375 | -5.12892 | -0.08605 |
| H  | -4.15435 | -3.65516 | 0.91161  |
| H  | 5.90725  | -5.77102 | 3.40209  |
| H  | 9.22325  | 0.26143  | -0.70491 |
| H  | 9.25202  | -1.22480 | -0.10279 |
| O  | 7.20323  | 1.28855  | 4.20956  |
| O  | 7.61628  | -0.12980 | 2.48912  |
| O  | 8.68280  | 2.26407  | 0.90295  |
| O  | 5.39237  | 2.04650  | 1.67222  |
| O  | 9.97111  | 1.70460  | -0.84858 |
| C  | 7.66549  | 0.23101  | 3.69003  |
| C  | 8.36495  | -0.69671 | 4.65126  |
| C  | 9.59177  | 2.49528  | 0.02286  |
| C  | 10.23755 | 3.86302  | 0.04924  |
| H  | 4.87883  | 1.18964  | 1.71778  |
| H  | 4.85005  | 2.67585  | 1.11565  |
| H  | 6.57260  | 2.04335  | 4.02912  |
| Cd | -6.52712 | 0.09646  | -1.79633 |
| H  | -6.04867 | -1.22137 | -5.31904 |
| O  | -6.67930 | -0.46657 | -5.49947 |
| O  | -7.09235 | 0.95177  | -3.77902 |
| O  | -8.15888 | -1.44208 | -2.19285 |
| O  | -4.86846 | -1.22450 | -2.96214 |
| O  | -9.44720 | -0.88261 | -0.44131 |
| C  | -7.14158 | 0.59097  | -4.97993 |
| C  | -7.84103 | 1.51870  | -5.94118 |
| C  | -9.06786 | -1.67329 | -1.31276 |
| C  | -9.71363 | -3.04102 | -1.33914 |
| H  | -4.35492 | -0.36764 | -3.00769 |
| H  | -4.32614 | -1.85386 | -2.40556 |
| I  | -2.69238 | -0.21151 | 1.10524  |
| I  | -6.14464 | 4.16967  | -3.05435 |

|   |          |          |          |
|---|----------|----------|----------|
| I | -0.79467 | 1.72442  | -1.60694 |
| I | -8.06850 | -2.09237 | 3.04987  |
| I | -3.14891 | -4.49086 | 5.44572  |
| I | -1.34198 | 7.69779  | -2.69491 |
| O | -6.37493 | 0.65946  | 1.90680  |
| O | -4.49098 | 6.95514  | -4.42264 |
| O | -5.96188 | -0.75887 | 0.18636  |
| O | -4.89537 | 1.63499  | -1.39980 |
| O | -8.18578 | 1.41742  | -0.63053 |
| O | -3.60704 | 1.07550  | -3.15135 |
| N | -1.05387 | -1.31550 | 3.71543  |
| C | -3.81538 | -1.36124 | 2.44576  |
| O | -6.70674 | -4.87847 | 4.83545  |
| C | -5.99442 | -2.13425 | 3.16867  |
| O | 0.28489  | -3.77791 | 3.77586  |
| O | 2.10498  | 5.96344  | -2.94050 |
| N | 0.74624  | 4.40943  | -1.04494 |
| C | -5.91266 | -0.39808 | 1.38726  |
| C | 2.76027  | 3.93578  | 0.05844  |
| N | -0.00263 | 4.93769  | -1.97669 |
| H | 0.41849  | 5.55580  | -2.64046 |
| O | -6.34672 | -3.15160 | 6.18986  |
| C | -5.21320 | -1.32580 | 2.34850  |
| C | -3.99100 | -3.06307 | 4.15775  |
| O | 3.96055  | 3.90007  | 0.12674  |
| O | 2.06095  | -0.13997 | 4.62666  |
| C | -2.17092 | 5.76463  | -2.46234 |
| N | -1.79381 | -2.36347 | 3.48536  |
| H | -1.36909 | -3.26309 | 3.38390  |
| O | -4.79599 | 7.54754  | -2.30017 |
| C | -3.98638 | 1.86620  | -2.27990 |
| C | 2.04668  | 4.62624  | -1.03556 |
| C | -5.38254 | -2.99843 | 4.07875  |
| C | -3.34061 | 3.23394  | -2.25352 |
| C | 0.92900  | -2.77502 | 4.00643  |
| C | -1.97190 | 3.42800  | -2.01219 |
| C | 0.22209  | -1.43109 | 3.94324  |
| C | 0.95235  | -0.15759 | 4.18138  |
| C | -4.34324 | 6.78140  | -3.21836 |
| C | 2.76194  | 5.42057  | -2.07713 |
| C | -4.09738 | 4.35054  | -2.61836 |
| C | -1.37230 | 4.67342  | -2.08164 |
| C | -3.51705 | 5.62532  | -2.74235 |
| C | 0.23295  | 1.11676  | 3.81923  |
| H | -0.09313 | 1.06672  | 2.78035  |
| H | -0.63465 | 1.23965  | 4.46752  |
| H | 0.90805  | 1.96259  | 3.94924  |
| C | -3.19805 | -2.22978 | 3.38023  |
| C | 1.94743  | 3.17841  | 1.08643  |
| H | 2.57881  | 2.93457  | 1.94083  |
| H | 1.10811  | 3.79310  | 1.41170  |
| H | 1.57163  | 2.25754  | 0.64048  |
| C | 4.27296  | 5.48567  | -2.11961 |

|   |           |          |          |
|---|-----------|----------|----------|
| H | 4.58731   | 6.07968  | -2.97777 |
| H | 4.63767   | 5.95093  | -1.20385 |
| H | 4.67826   | 4.47715  | -2.20152 |
| C | -6.22645  | -3.78580 | 5.04497  |
| C | 2.36142   | -2.86200 | 4.28162  |
| H | 2.71411   | -3.86846 | 4.05634  |
| H | 2.89367   | -2.14202 | 3.65999  |
| H | 2.54324   | -2.63968 | 5.33311  |
| H | -5.38333  | 6.59300  | -4.69200 |
| H | -6.82209  | -3.72254 | 6.85922  |
| H | -8.69933  | 0.56057  | -0.58500 |
| H | -8.72811  | 2.04677  | -1.18712 |
| H | -7.00557  | 1.41427  | 1.72638  |
| H | -8.33834  | 0.93312  | -6.71438 |
| H | -7.10992  | 2.18283  | -6.40214 |
| H | -8.58039  | 2.11068  | -5.40174 |
| H | -8.96480  | -3.80073 | -1.11517 |
| H | -10.13386 | -3.22537 | -2.32783 |
| H | -10.50752 | -3.08239 | -0.59344 |
| H | 9.74333   | 4.51214  | -0.67360 |
| H | 11.29309  | 3.77140  | -0.20679 |
| H | 10.14151  | 4.29093  | 1.04709  |
| H | 9.44385   | -0.58246 | 4.54636  |
| H | 8.08544   | -1.72684 | 4.43037  |
| H | 8.07111   | -0.45137 | 5.67182  |
| H | 4.66648   | 1.94378  | -3.62614 |
| H | 6.12578   | 1.98908  | -4.64431 |
| H | 5.91359   | 3.18103  | -3.33953 |

### 3M3<sub>1...o</sub>

|    |          |          |          |
|----|----------|----------|----------|
| Cd | -1.13904 | 2.93299  | -2.24085 |
| I  | -1.35550 | -1.61156 | -0.38373 |
| I  | -6.60137 | -2.47303 | 2.57355  |
| O  | -3.42662 | -5.96032 | 1.01055  |
| O  | -2.75904 | 1.34568  | -1.97522 |
| N  | -3.73632 | -3.13391 | 1.35202  |
| O  | -8.04177 | 0.22171  | 0.76356  |
| O  | -1.80989 | 1.92679  | -0.10710 |
| C  | -3.19680 | -0.94543 | 0.33695  |
| O  | -7.25731 | 0.97710  | 2.63605  |
| C  | -5.31004 | -1.27655 | 1.46196  |
| N  | -1.81310 | -6.82779 | 2.26611  |
| H  | -2.08139 | -7.72009 | 1.90302  |
| N  | -2.67345 | -3.25188 | 2.03760  |
| C  | -3.59350 | 0.37189  | 0.02684  |
| C  | -4.05355 | -1.77973 | 1.10129  |
| O  | -0.18603 | -7.82104 | 3.49831  |
| C  | -5.72032 | 0.01548  | 1.13524  |
| C  | -4.85538 | 0.81877  | 0.42205  |
| C  | -2.13258 | -4.47086 | 2.34480  |
| C  | -2.54112 | -5.73504 | 1.84052  |
| C  | -2.64435 | 1.26304  | -0.73570 |
| C  | -7.10059 | 0.47659  | 1.54150  |
| N  | -0.40182 | -5.60027 | 3.57093  |



|    |          |          |          |
|----|----------|----------|----------|
| H  | 0.37774  | -5.55474 | 4.19560  |
| C  | -0.75833 | -6.80552 | 3.13776  |
| C  | -1.01433 | -4.39737 | 3.23542  |
| I  | -5.42025 | 2.80639  | 0.04994  |
| O  | -0.52489 | -3.34486 | 3.71643  |
| H  | -0.99772 | -2.56122 | 3.31353  |
| Cd | -5.29435 | -4.72578 | 0.74995  |
| I  | -2.44605 | 5.18573  | -0.41725 |
| O  | 0.72870  | 1.69845  | -1.98026 |
| N  | 0.41900  | 4.52485  | -1.63879 |
| O  | -0.88243 | 2.80569  | -4.54958 |
| O  | -2.30463 | 4.29204  | -3.87109 |
| I  | 8.01067  | -7.23879 | -0.45974 |
| O  | 4.83591  | -3.75150 | 1.10325  |
| N  | 5.14561  | -6.57791 | 0.76179  |
| H  | 4.80486  | -8.57284 | 1.59953  |
| C  | 6.71933  | -8.43527 | 0.65185  |
| N  | 3.22240  | -2.88403 | -0.15229 |
| H  | 3.49069  | -1.99173 | 0.21079  |
| N  | 4.08275  | -6.45993 | 0.07620  |
| C  | 5.46285  | -7.93209 | 1.01251  |
| O  | 1.59532  | -1.89077 | -1.38450 |
| H  | 7.04005  | -9.44523 | 0.90723  |
| C  | 3.54188  | -5.24097 | -0.23098 |
| C  | 3.95042  | -3.97678 | 0.27329  |
| N  | 1.81111  | -4.11154 | -1.45712 |
| H  | 1.03155  | -4.15709 | -2.08179 |
| C  | 2.16762  | -2.90629 | -1.02395 |
| C  | 2.42361  | -5.31445 | -1.12161 |
| O  | 1.93418  | -6.36696 | -1.60262 |
| H  | 2.40702  | -7.15061 | -1.19971 |
| Cd | 6.70364  | -4.98604 | 1.36386  |
| H  | 1.92042  | 6.36535  | -3.03034 |
| C  | 0.95851  | 6.71334  | -2.65386 |
| C  | -1.15473 | 6.38221  | -1.52885 |
| N  | 2.34221  | 0.83097  | -0.72470 |
| H  | 2.07391  | -0.06132 | -1.08779 |
| N  | 1.48185  | 4.40689  | -0.95320 |
| C  | 0.56182  | 8.03065  | -2.96397 |
| C  | 0.10175  | 5.87904  | -1.88951 |
| O  | 3.96928  | -0.16227 | 0.50750  |
| C  | -1.56501 | 7.67425  | -1.85557 |
| C  | -0.70006 | 8.47754  | -2.56876 |
| C  | 2.02273  | 3.18791  | -0.64601 |
| C  | 1.61418  | 1.92373  | -1.15029 |
| H  | 1.24750  | 8.67445  | -3.51485 |
| H  | -2.56077 | 8.00691  | -1.56248 |
| N  | 3.75350  | 2.05849  | 0.58012  |
| H  | 4.53305  | 2.10403  | 1.20480  |
| C  | 3.39698  | 0.85325  | 0.14695  |
| C  | 3.14099  | 3.26141  | 0.24461  |
| H  | -0.99332 | 9.50942  | -2.76194 |
| O  | 3.63043  | 4.31391  | 0.72562  |

|   |          |          |          |
|---|----------|----------|----------|
| H | 3.15759  | 5.09755  | 0.32272  |
| C | -1.76327 | 3.66411  | -4.75751 |
| C | -5.91857 | -3.99466 | -1.76670 |
| C | -2.25562 | 3.82332  | -6.17703 |
| O | 7.37450  | -3.97985 | -0.76991 |
| O | 8.32364  | -3.39873 | 1.09822  |
| C | 8.20895  | -3.31610 | -0.14130 |
| O | 6.44705  | -4.85874 | 3.67258  |
| O | 7.86924  | -6.34509 | 2.99409  |
| C | 7.32787  | -5.71716 | 3.88051  |
| O | -6.91435 | -6.31309 | 1.01559  |
| O | -5.96520 | -5.73198 | 2.88371  |
| C | -6.79966 | -6.39573 | 2.25511  |
| O | -5.03775 | -4.85308 | -1.55877 |
| O | -6.45994 | -3.36673 | -0.88028 |
| C | -6.41094 | -3.83544 | -3.18622 |
| H | -8.97767 | 0.56071  | 0.85911  |
| C | -7.73995 | -7.36871 | 3.03949  |
| H | -7.29198 | -8.36196 | 3.06879  |
| H | -8.70717 | -7.42092 | 2.53965  |
| H | -7.87594 | -7.00129 | 4.05662  |
| H | -5.94505 | -4.59067 | -3.81919 |
| H | -6.14921 | -2.84270 | -3.55233 |
| H | -7.49370 | -3.95812 | -3.21110 |
| C | 7.75631  | -5.99854 | 5.35813  |
| H | 8.53557  | -6.76054 | 5.37161  |
| H | 6.89459  | -6.34996 | 5.92560  |
| H | 8.13733  | -5.08120 | 5.80688  |
| C | 9.14924  | -2.34311 | -0.92567 |
| H | 8.64332  | -1.99671 | -1.82685 |
| H | 10.06491 | -2.86623 | -1.20131 |
| H | 9.39476  | -1.48835 | -0.29546 |
| H | -2.07715 | 2.90060  | -6.72910 |
| H | -1.72129 | 4.64313  | -6.65709 |
| H | -3.32359 | 4.04108  | -6.16886 |

**2N4<sub>1...0</sub>**

|    |          |          |          |
|----|----------|----------|----------|
| Cd | 9.72722  | 1.47655  | -1.28779 |
| H  | 10.83923 | 0.45098  | -4.76438 |
| O  | 11.70590 | 0.78793  | -4.39649 |
| O  | 11.76189 | 1.24973  | -2.17707 |
| O  | 9.52831  | 3.29270  | -2.64758 |
| O  | 8.92643  | -0.01945 | -3.01287 |
| O  | 9.30257  | 4.80203  | -1.00090 |
| C  | 12.28115 | 1.07353  | -3.30583 |
| C  | 13.77901 | 1.22202  | -3.39660 |
| C  | 9.16095  | 4.42953  | -2.17123 |
| C  | 8.47978  | 5.38399  | -3.12698 |
| H  | 9.35109  | -0.73486 | -2.45802 |
| H  | 7.94446  | -0.20831 | -3.02048 |
| I  | 6.27263  | -1.23049 | 0.70138  |
| I  | 5.77992  | 4.76736  | 0.77177  |
| I  | 0.79925  | 1.47492  | 0.99138  |
| O  | 7.74854  | 2.16518  | 1.82090  |

|    |           |          |          |
|----|-----------|----------|----------|
| O  | 7.69256   | 1.70338  | -0.39852 |
| O  | 9.92614   | -0.33959 | 0.07199  |
| O  | 10.52801  | 2.97256  | 0.43728  |
| O  | 10.15188  | -1.84893 | -1.57469 |
| N  | 3.27459   | -1.76706 | 1.90158  |
| C  | 5.06761   | 0.47004  | 0.89133  |
| O  | 2.24435   | 4.71538  | 0.22202  |
| C  | 4.90126   | 2.88665  | 0.86461  |
| O  | 1.04529   | -2.33960 | 0.30101  |
| C  | 7.17330   | 1.87958  | 0.73024  |
| O  | 2.45122   | 4.28179  | 2.39349  |
| C  | 5.67544   | 1.73109  | 0.82102  |
| C  | 2.89753   | 1.53670  | 0.99633  |
| O  | 2.34862   | -4.72606 | 3.41853  |
| N  | 2.97518   | -0.86391 | 1.01086  |
| H  | 2.26182   | -1.04606 | 0.33414  |
| C  | 10.29350  | -1.47642 | -0.40436 |
| C  | 3.51167   | 2.78899  | 0.95933  |
| C  | 10.97467  | -2.43088 | 0.55139  |
| C  | 1.34927   | -3.14180 | 1.16003  |
| C  | 2.57591   | -2.85933 | 2.01173  |
| C  | 3.02878   | -3.81115 | 3.06090  |
| C  | 4.39867   | -3.57768 | 3.64530  |
| H  | 5.13387   | -3.53671 | 2.84163  |
| H  | 4.40349   | -2.63439 | 4.19144  |
| H  | 4.64591   | -4.39356 | 4.32452  |
| C  | 3.65777   | 0.37494  | 1.00114  |
| C  | 2.68440   | 4.03572  | 1.12363  |
| C  | 0.58219   | -4.37421 | 1.32697  |
| H  | -0.10041  | -4.49395 | 0.48565  |
| H  | 1.26499   | -5.22297 | 1.36554  |
| H  | 0.01139   | -4.32375 | 2.25420  |
| H  | 1.81973   | 5.05091  | 2.49185  |
| H  | 10.10336  | 3.68797  | -0.11757 |
| H  | 11.50999  | 3.16142  | 0.44489  |
| H  | 8.61521   | 2.50213  | 2.18879  |
| Cd | -10.88938 | -1.45321 | 2.29907  |
| I  | -7.43478  | 1.25383  | 0.30989  |
| H  | -9.77737  | -2.47879 | -1.17752 |
| I  | -6.94207  | -4.74402 | 0.23950  |
| I  | -1.96141  | -1.45158 | 0.01989  |
| O  | -8.91070  | -2.14183 | -0.80962 |
| O  | -8.85471  | -1.68004 | 1.40979  |
| O  | -11.08829 | 0.36293  | 0.93928  |
| O  | -11.69017 | -2.94922 | 0.57399  |
| O  | -11.31404 | 1.87227  | 2.58597  |
| N  | -4.43675  | 1.79040  | -0.89030 |
| C  | -6.22977  | -0.44670 | 0.11994  |
| O  | -3.40651  | -4.69204 | 0.78926  |
| C  | -6.06341  | -2.86331 | 0.14666  |
| O  | -2.20744  | 2.36294  | 0.71027  |
| C  | -8.33546  | -1.85624 | 0.28103  |
| O  | -3.61337  | -4.25845 | -1.38222 |

|   |           |          |          |
|---|-----------|----------|----------|
| C | -6.83759  | -1.70775 | 0.19026  |
| C | -4.05968  | -1.51336 | 0.01494  |
| O | -3.51077  | 4.74940  | -2.40726 |
| N | -4.13734  | 0.88725  | 0.00042  |
| H | -3.42398  | 1.06940  | 0.67713  |
| C | -11.45565 | 1.49976  | 1.41563  |
| C | -4.67383  | -2.76565 | 0.05194  |
| C | -12.13682 | 2.45422  | 0.45988  |
| C | -2.51143  | 3.16514  | -0.14875 |
| C | -3.73806  | 2.88267  | -1.00046 |
| C | -4.19094  | 3.83449  | -2.04962 |
| C | -5.56082  | 3.60103  | -2.63403 |
| H | -6.29603  | 3.56005  | -1.83036 |
| H | -5.56564  | 2.65773  | -3.18017 |
| H | -5.80806  | 4.41690  | -3.31324 |
| C | -4.81993  | -0.35160 | 0.01013  |
| C | -3.84656  | -4.01238 | -0.11236 |
| C | -1.74435  | 4.39755  | -0.31570 |
| H | -1.06175  | 4.51729  | 0.52562  |
| H | -2.42714  | 5.24631  | -0.35427 |
| H | -1.17355  | 4.34709  | -1.24292 |
| H | -2.98189  | -5.02757 | -1.48058 |
| H | -11.26551 | -3.66463 | 1.12884  |
| H | -12.67214 | -3.13808 | 0.56638  |
| O | -12.86806 | -0.76459 | 5.40776  |
| O | -12.92405 | -1.22639 | 3.18834  |
| O | -10.69047 | -3.26936 | 3.65885  |
| O | -10.08859 | 0.04279  | 4.02414  |
| O | -10.46472 | -4.77869 | 2.01217  |
| C | -13.44330 | -1.05019 | 4.31710  |
| C | -14.94117 | -1.19868 | 4.40788  |
| C | -10.32311 | -4.40619 | 3.18250  |
| C | -9.64194  | -5.36064 | 4.13825  |
| H | -10.51325 | 0.75820  | 3.46929  |
| H | -9.10662  | 0.23166  | 4.03175  |
| H | -12.00139 | -0.42764 | 5.77565  |
| H | -15.21723 | -2.23192 | 4.19745  |
| H | -15.41625 | -0.54031 | 3.68061  |
| H | -15.27263 | -0.93114 | 5.41118  |
| H | -13.21668 | 2.31800  | 0.51845  |
| H | -11.79974 | 2.25248  | -0.55685 |
| H | -11.88481 | 3.47982  | 0.72947  |
| H | -9.03968  | -6.07222 | 3.57343  |
| H | -10.39564 | -5.89846 | 4.71336  |
| H | -8.99973  | -4.79891 | 4.81654  |
| H | 14.04597  | 1.62001  | -4.37559 |
| H | 14.24958  | 0.24845  | -3.25950 |
| H | 14.12410  | 1.90493  | -2.62033 |
| H | 7.40654   | 5.19363  | -3.12719 |
| H | 8.87530   | 5.23586  | -4.13182 |
| H | 8.66674   | 6.41012  | -2.81051 |
| H | 11.75635  | -2.97726 | 0.02365  |
| H | 10.24189  | -3.13499 | 0.94551  |

|                              |          |          |          |
|------------------------------|----------|----------|----------|
| H                            | 11.41652 | -1.86803 | 1.37359  |
| <b>3<sub>M</sub> initial</b> |          |          |          |
| I                            | -4.98536 | 4.36409  | -2.68947 |
| I                            | -0.20103 | 2.42624  | 0.52948  |
| O                            | -1.60337 | 7.13153  | -0.23001 |
| O                            | -6.81351 | 1.36144  | -1.74614 |
| N                            | -2.10514 | 4.43298  | -1.04682 |
| O                            | -5.72056 | 0.97926  | -3.58675 |
| C                            | -3.89578 | 2.86918  | -1.72432 |
| C                            | -2.03144 | 2.08416  | -0.40181 |
| N                            | -0.82062 | 8.41556  | -1.86430 |
| H                            | -0.75042 | 9.14688  | -1.18590 |
| N                            | -1.85943 | 4.89629  | -2.20379 |
| C                            | -4.44623 | 1.57159  | -1.67834 |
| C                            | -2.64487 | 3.12820  | -1.10588 |
| O                            | -0.02254 | 9.82078  | -3.45827 |
| C                            | -2.58320 | 0.80562  | -0.32871 |
| C                            | -3.78247 | 0.57021  | -0.96774 |
| C                            | -1.39626 | 6.16915  | -2.39892 |
| C                            | -1.27754 | 7.19152  | -1.41908 |
| C                            | -5.74787 | 1.30169  | -2.39205 |
| N                            | -0.59756 | 7.74122  | -4.03146 |
| H                            | -0.35376 | 7.94559  | -4.97953 |
| C                            | -0.45497 | 8.72316  | -3.14668 |
| C                            | -1.05393 | 6.45588  | -3.75898 |
| I                            | -4.54183 | -1.38722 | -0.97076 |
| O                            | -1.15426 | 5.66023  | -4.72621 |
| H                            | -1.58523 | 4.81814  | -4.40192 |
| Cd                           | -1.54361 | 5.26430  | 1.03105  |
| I                            | 2.76047  | -3.21924 | 3.12790  |
| I                            | 7.99872  | -1.77071 | 0.39486  |
| O                            | 7.13031  | -5.66881 | 3.35017  |
| O                            | -0.20403 | 5.93675  | 2.75380  |
| N                            | 5.84550  | -3.52629 | 1.95016  |
| O                            | 7.32138  | 1.66894  | 0.96284  |
| O                            | 0.88893  | 5.55457  | 0.91319  |
| C                            | 3.99676  | -1.89183 | 2.09682  |
| O                            | 6.59213  | 1.12804  | -1.00383 |
| C                            | 6.08627  | -1.27414 | 1.05115  |
| N                            | 6.53939  | -7.68003 | 2.61661  |
| H                            | 7.19532  | -8.05470 | 3.27187  |
| N                            | 5.17547  | -4.47011 | 1.42680  |
| C                            | 3.51888  | -0.58588 | 1.86238  |
| C                            | 5.29317  | -2.26010 | 1.65185  |
| O                            | 6.00434  | -9.78372 | 1.95287  |
| C                            | 5.63068  | 0.02685  | 0.84073  |
| C                            | 4.35416  | 0.35020  | 1.25063  |
| C                            | 5.48106  | -5.78757 | 1.63579  |
| C                            | 6.43509  | -6.30515 | 2.55302  |
| C                            | 0.86164  | 5.87700  | 2.10791  |
| C                            | 6.55539  | 1.03924  | 0.20607  |
| N                            | 4.93818  | -8.05019 | 1.03540  |
| H                            | 4.39367  | -8.68668 | 0.48916  |

|   |          |          |          |
|---|----------|----------|----------|
| C | 5.82950  | -8.57913 | 1.86792  |
| C | 4.69444  | -6.69279 | 0.85419  |
| I | 3.62279  | 2.26841  | 0.81045  |
| O | 3.79048  | -6.37039 | 0.04325  |
| H | 3.65879  | -5.38025 | 0.09100  |
| O | -3.61033 | 5.82907  | 1.93767  |
| O | -2.97653 | 3.79192  | 2.31251  |
| C | -4.85425 | 4.57025  | 3.49904  |
| C | -3.74557 | 4.71531  | 2.48288  |
| H | -5.47703 | 3.71476  | 3.23760  |
| H | -4.42270 | 4.41679  | 4.48812  |
| H | -5.46274 | 5.47454  | 3.50442  |
| H | 7.19526  | 1.73612  | -1.51999 |
| H | -6.49502 | 0.61576  | -4.10447 |
| C | 2.16328  | 6.14690  | 2.82163  |
| H | 2.91347  | 6.46930  | 2.09959  |
| H | 2.50223  | 5.23641  | 3.31579  |
| H | 2.01438  | 6.92995  | 3.56508  |
| H | 2.50617  | -0.30995 | 2.15632  |
| H | -2.07849 | 0.01090  | 0.22063  |

### $3_M$ optimized

|    |           |           |           |
|----|-----------|-----------|-----------|
| 53 | 6.915494  | 1.241873  | -1.290105 |
| 53 | 1.351741  | -0.249867 | 0.391572  |
| 8  | 5.619481  | -2.711128 | 1.050746  |
| 8  | 6.398992  | 4.658475  | -0.090117 |
| 7  | 4.350925  | -0.554862 | -0.332613 |
| 8  | 5.745681  | 4.537545  | -2.237710 |
| 6  | 4.978039  | 1.787875  | -0.782543 |
| 6  | 2.740946  | 1.213360  | -0.061924 |
| 7  | 5.914771  | -4.489180 | -0.310063 |
| 1  | 6.179123  | -5.028319 | 0.515965  |
| 7  | 4.694724  | -1.140265 | -1.377103 |
| 6  | 4.647132  | 3.140725  | -0.694280 |
| 6  | 4.019852  | 0.821216  | -0.461498 |
| 8  | 6.290603  | -6.315527 | -1.640825 |
| 6  | 2.407331  | 2.558268  | 0.008461  |
| 6  | 3.362278  | 3.520084  | -0.300210 |
| 6  | 5.123211  | -2.448421 | -1.276535 |
| 6  | 5.531146  | -3.171340 | -0.079482 |
| 6  | 5.696596  | 4.189011  | -0.944664 |
| 7  | 5.633100  | -4.360201 | -2.614732 |
| 1  | 5.679669  | -4.804618 | -3.531687 |
| 6  | 5.970301  | -5.161694 | -1.512572 |
| 6  | 5.242097  | -3.073352 | -2.510526 |
| 53 | 2.863057  | 5.526807  | -0.142617 |
| 8  | 4.979114  | -2.470121 | -3.649787 |
| 1  | 4.734808  | -1.543294 | -3.426036 |
| 48 | 3.978850  | -1.358294 | 1.798117  |
| 53 | -4.545593 | 2.312961  | 0.858633  |
| 53 | -7.411669 | -2.910058 | -0.560516 |
| 8  | -9.984112 | 0.020151  | 0.045179  |
| 8  | 3.028170  | -3.109391 | 2.913643  |
| 7  | -7.124490 | 0.081706  | 0.079395  |

|    |            |           |           |
|----|------------|-----------|-----------|
| 8  | -4.390417  | -4.766060 | 0.427819  |
| 8  | 2.887781   | -3.264759 | 0.707081  |
| 6  | -4.617889  | 0.290464  | 0.327939  |
| 8  | -4.234426  | -4.204705 | -1.743389 |
| 6  | -5.692969  | -1.807624 | -0.188226 |
| 7  | -10.863523 | 2.084039  | -0.314095 |
| 1  | -11.789328 | 1.667776  | -0.211845 |
| 7  | -7.217987  | 1.266938  | -0.303807 |
| 6  | -3.383962  | -0.352980 | 0.317212  |
| 6  | -5.798300  | -0.424396 | 0.058945  |
| 8  | -11.824500 | 4.130191  | -0.692950 |
| 6  | -4.457651  | -2.450374 | -0.196694 |
| 6  | -3.300966  | -1.714833 | 0.050088  |
| 6  | -8.473571  | 1.847699  | -0.328693 |
| 6  | -9.774431  | 1.190744  | -0.167760 |
| 6  | 2.657219   | -3.716336 | 1.861580  |
| 6  | -4.368929  | -3.933165 | -0.437111 |
| 7  | -9.551350  | 3.950251  | -0.727513 |
| 1  | -9.477191  | 4.950625  | -0.906215 |
| 6  | -10.844762 | 3.431100  | -0.584386 |
| 6  | -8.426591  | 3.204790  | -0.608166 |
| 53 | -1.442769  | -2.619298 | 0.033008  |
| 8  | -7.304544  | 3.878972  | -0.766106 |
| 1  | -6.555546  | 3.260204  | -0.587464 |
| 8  | 5.511288   | 0.349719  | 2.180977  |
| 8  | 3.429613   | 0.781577  | 2.789375  |
| 6  | 5.038752   | 2.560379  | 2.952847  |
| 6  | 4.628215   | 1.142722  | 2.628388  |
| 1  | 5.599969   | 2.988074  | 2.106824  |
| 1  | 4.162878   | 3.178164  | 3.187680  |
| 1  | 5.719325   | 2.539346  | 3.818206  |
| 1  | -4.187262  | -5.175786 | -1.829760 |
| 1  | 6.441646   | 5.216436  | -2.325675 |
| 6  | 1.888179   | -5.008155 | 2.013627  |
| 1  | 2.232391   | -5.738727 | 1.268098  |
| 1  | 0.825284   | -4.799989 | 1.811480  |
| 1  | 1.986978   | -5.407763 | 3.030075  |
| 1  | -2.472136  | 0.210712  | 0.523344  |
| 1  | 1.408104   | 2.854002  | 0.327991  |

### 1N3<sub>M</sub>

|   |          |          |          |
|---|----------|----------|----------|
| I | 2.27899  | -0.52938 | 1.03050  |
| I | -2.78955 | 2.36055  | -0.70236 |
| O | -2.45353 | -2.16301 | 1.32433  |
| O | 4.11152  | 1.12624  | -1.64536 |
| N | -0.94531 | 0.19869  | 0.73380  |
| O | -1.04821 | 3.70341  | -3.49112 |
| O | 4.19533  | 2.36088  | 0.14268  |
| C | 1.27995  | 0.99917  | 0.01387  |
| O | -0.95069 | 5.12164  | -1.85673 |
| C | -0.72008 | 2.13393  | -0.72994 |
| N | -2.63817 | -2.56935 | 3.49990  |
| H | -3.21500 | -3.34794 | 3.25280  |
| N | -0.70450 | 0.17526  | 1.98083  |

|    |          |          |          |
|----|----------|----------|----------|
| C  | 2.04909  | 1.90043  | -0.75098 |
| C  | -0.13199 | 1.13629  | 0.05800  |
| O  | -2.88627 | -3.08559 | 5.69633  |
| C  | 0.03208  | 3.01130  | -1.51026 |
| C  | 1.40493  | 2.87976  | -1.50871 |
| C  | -1.32175 | -0.70387 | 2.82872  |
| C  | -2.16067 | -1.79148 | 2.46445  |
| C  | 3.55264  | 1.77522  | -0.73823 |
| C  | -0.67864 | 4.04671  | -2.35027 |
| N  | -1.59429 | -1.35696 | 5.12519  |
| H  | -1.38750 | -1.20473 | 6.09166  |
| C  | -2.39638 | -2.37607 | 4.83296  |
| C  | -1.01728 | -0.48290 | 4.20987  |
| I  | 2.54131  | 4.28623  | -2.57582 |
| O  | -0.25789 | 0.41019  | 4.66203  |
| H  | 0.15915  | 0.89287  | 3.89190  |
| Cd | -2.64056 | -0.80656 | -0.46603 |
| O  | -4.77115 | -1.26519 | -1.14777 |
| O  | -4.68734 | -0.03056 | 0.64028  |
| C  | -6.83356 | -0.49100 | -0.25338 |
| C  | -5.32999 | -0.61621 | -0.24064 |
| O  | -1.50283 | -2.37490 | -1.75372 |
| O  | -1.69300 | -0.41668 | -2.65999 |
| C  | -0.90423 | -2.16290 | -4.02671 |
| C  | -1.37078 | -1.58573 | -2.71068 |
| H  | -7.27280 | -1.33329 | 0.28114  |
| H  | -7.18924 | -0.48913 | -1.28371 |
| H  | -7.12474 | 0.43985  | 0.23321  |
| H  | -0.03790 | -1.60462 | -4.38150 |
| H  | -1.70763 | -2.09159 | -4.75988 |
| H  | -0.63061 | -3.20883 | -3.88809 |
| H  | -1.45145 | 5.85663  | -2.31387 |
| H  | 5.19105  | 2.44939  | 0.16855  |

#### 1N4<sub>M</sub>

|    |          |          |          |
|----|----------|----------|----------|
| Cd | 9.72722  | 1.47655  | -1.28779 |
| H  | 10.83923 | 0.45098  | -4.76438 |
| O  | 11.70590 | 0.78793  | -4.39649 |
| O  | 11.76189 | 1.24973  | -2.17707 |
| O  | 9.52831  | 3.29270  | -2.64758 |
| O  | 8.92643  | -0.01945 | -3.01287 |
| O  | 9.30257  | 4.80203  | -1.00090 |
| C  | 12.28115 | 1.07353  | -3.30583 |
| C  | 13.77901 | 1.22202  | -3.39660 |
| C  | 9.16095  | 4.42953  | -2.17123 |
| C  | 8.47978  | 5.38399  | -3.12698 |
| H  | 9.35109  | -0.73486 | -2.45802 |
| H  | 7.94446  | -0.20831 | -3.02048 |
| I  | 6.27263  | -1.23049 | 0.70138  |
| I  | 5.77992  | 4.76736  | 0.77177  |
| I  | 0.79925  | 1.47492  | 0.99138  |
| O  | 7.74854  | 2.16518  | 1.82090  |
| O  | 7.69256  | 1.70338  | -0.39852 |
| O  | 9.92614  | -0.33959 | 0.07199  |



|   |          |          |          |
|---|----------|----------|----------|
| O | 10.52801 | 2.97256  | 0.43728  |
| O | 10.15188 | -1.84893 | -1.57469 |
| N | 3.27459  | -1.76706 | 1.90158  |
| C | 5.06761  | 0.47004  | 0.89133  |
| O | 2.24435  | 4.71538  | 0.22202  |
| C | 4.90126  | 2.88665  | 0.86461  |
| O | 1.04529  | -2.33960 | 0.30101  |
| C | 7.17330  | 1.87958  | 0.73024  |
| O | 2.45122  | 4.28179  | 2.39349  |
| C | 5.67544  | 1.73109  | 0.82102  |
| C | 2.89753  | 1.53670  | 0.99633  |
| O | 2.34862  | -4.72606 | 3.41853  |
| N | 2.97518  | -0.86391 | 1.01086  |
| H | 2.26182  | -1.04606 | 0.33414  |
| C | 10.29350 | -1.47642 | -0.40436 |
| C | 3.51167  | 2.78899  | 0.95933  |
| C | 10.97467 | -2.43088 | 0.55139  |
| C | 1.34927  | -3.14180 | 1.16003  |
| C | 2.57591  | -2.85933 | 2.01173  |
| C | 3.02878  | -3.81115 | 3.06090  |
| C | 4.39867  | -3.57768 | 3.64530  |
| H | 5.13387  | -3.53671 | 2.84163  |
| H | 4.40349  | -2.63439 | 4.19144  |
| H | 4.64591  | -4.39356 | 4.32452  |
| C | 3.65777  | 0.37494  | 1.00114  |
| C | 2.68440  | 4.03572  | 1.12363  |
| C | 0.58219  | -4.37421 | 1.32697  |
| H | -0.10041 | -4.49395 | 0.48565  |
| H | 1.26499  | -5.22297 | 1.36554  |
| H | 0.01139  | -4.32375 | 2.25420  |
| H | 1.81973  | 5.05091  | 2.49185  |
| H | 10.10336 | 3.68797  | -0.11757 |
| H | 11.50999 | 3.16142  | 0.44489  |
| H | 8.61521  | 2.50213  | 2.18879  |
| H | 14.04597 | 1.62001  | -4.37559 |
| H | 14.24958 | 0.24845  | -3.25950 |
| H | 14.12410 | 1.90493  | -2.62033 |
| H | 7.40654  | 5.19363  | -3.12719 |
| H | 8.87530  | 5.23586  | -4.13182 |
| H | 8.66674  | 6.41012  | -2.81051 |
| H | 11.75635 | -2.97726 | 0.02365  |
| H | 10.24189 | -3.13499 | 0.94551  |
| H | 11.41652 | -1.86803 | 1.37359  |

### 2N3<sub>l...l</sub>M1

|   |          |          |          |
|---|----------|----------|----------|
| I | 8.23165  | -0.30395 | 0.67886  |
| I | 3.08330  | 2.93577  | 0.60494  |
| O | 3.54610  | -1.98119 | 0.06412  |
| O | 10.00893 | 2.52081  | -0.77372 |
| N | 4.98993  | 0.39082  | 0.76415  |
| O | 4.77513  | 5.54890  | -1.10440 |
| O | 10.07007 | 2.68126  | 1.39399  |
| C | 7.19011  | 1.50060  | 0.56807  |
| O | 4.84447  | 5.94579  | 1.02397  |

|    |          |          |          |
|----|----------|----------|----------|
| C  | 5.15773  | 2.80576  | 0.48424  |
| N  | 3.38314  | -3.43797 | 1.73253  |
| H  | 2.82531  | -3.99815 | 1.12015  |
| N  | 5.23764  | -0.25505 | 1.82956  |
| C  | 7.93189  | 2.68385  | 0.37175  |
| C  | 5.77536  | 1.56138  | 0.66339  |
| O  | 3.15966  | -5.00162 | 3.36267  |
| C  | 5.88303  | 3.97585  | 0.26230  |
| C  | 7.25880  | 3.89576  | 0.20887  |
| C  | 4.64761  | -1.45754 | 2.11002  |
| C  | 3.83514  | -2.23122 | 1.23784  |
| C  | 9.43821  | 2.60677  | 0.33228  |
| C  | 5.14157  | 5.27609  | 0.05633  |
| N  | 4.40376  | -3.19040 | 3.75691  |
| H  | 4.61150  | -3.54365 | 4.66910  |
| C  | 3.62668  | -3.94062 | 2.98187  |
| C  | 4.95338  | -1.95916 | 3.41540  |
| I  | 8.35309  | 5.67664  | 0.01097  |
| O  | 5.69179  | -1.39963 | 4.26414  |
| H  | 6.09231  | -0.58317 | 3.84821  |
| Cd | 3.31502  | 0.09015  | -0.79412 |
| I  | -0.58380 | -2.83743 | -0.18004 |
| I  | -5.73217 | 0.40231  | -0.25396 |
| O  | -5.26936 | -4.51464 | -0.79476 |
| O  | 1.19348  | -0.01266 | -1.63261 |
| N  | -3.82552 | -2.14264 | -0.09472 |
| O  | -4.04032 | 3.01546  | -1.96326 |
| O  | 1.25463  | 0.14781  | 0.53511  |
| C  | -1.62534 | -1.03286 | -0.29081 |
| O  | -3.97098 | 3.41234  | 0.16509  |
| C  | -3.65772 | 0.27230  | -0.37465 |
| N  | -5.43232 | -5.97143 | 0.87364  |
| H  | -5.99016 | -6.53160 | 0.26125  |
| N  | -3.57781 | -2.78852 | 0.97068  |
| C  | -0.88359 | 0.15040  | -0.48715 |
| C  | -3.04010 | -0.97206 | -0.19549 |
| O  | -5.65578 | -7.53507 | 2.50379  |
| C  | -2.93242 | 1.44238  | -0.59657 |
| C  | -1.55664 | 1.36229  | -0.65001 |
| C  | -4.16784 | -3.99101 | 1.25113  |
| C  | -4.98032 | -4.76467 | 0.37896  |
| C  | 0.62274  | 0.07332  | -0.52660 |
| C  | -3.67386 | 2.74263  | -0.80255 |
| N  | -4.41170 | -5.72389 | 2.89803  |
| H  | -4.20395 | -6.07711 | 3.81021  |
| C  | -5.18877 | -6.47408 | 2.12298  |
| C  | -3.86209 | -4.49260 | 2.55652  |
| O  | -3.12365 | -3.93309 | 3.40526  |
| H  | -2.72314 | -3.11664 | 2.98933  |
| Cd | -5.50044 | -2.44332 | -1.65301 |
| O  | 4.48616  | -0.58108 | -2.68889 |
| O  | 4.24097  | 1.56100  | -2.48010 |
| O  | -7.62197 | -2.54612 | -2.49148 |

|   |           |          |          |
|---|-----------|----------|----------|
| O | -7.56084  | -2.38565 | -0.32377 |
| C | -9.69903  | -2.38307 | -1.34602 |
| C | -8.19270  | -2.46014 | -1.38547 |
| O | -4.32931  | -3.11454 | -3.54778 |
| O | -4.57449  | -0.97247 | -3.33900 |
| C | -3.74801  | -1.76562 | -5.39501 |
| C | -4.22254  | -1.94637 | -3.97202 |
| C | 5.06743   | 0.76784  | -4.53615 |
| C | 4.59292   | 0.58708  | -3.11314 |
| H | -10.11369 | -3.39064 | -1.31556 |
| H | -10.05992 | -1.86838 | -2.23650 |
| H | -10.01159 | -1.83451 | -0.45752 |
| H | -2.89818  | -1.08325 | -5.41068 |
| H | -4.55673  | -1.35271 | -5.99797 |
| H | -3.44683  | -2.73049 | -5.80288 |
| H | 5.91726   | 1.45020  | -4.55182 |
| H | 4.25871   | 1.18075  | -5.13910 |
| H | 5.36860   | -0.19703 | -4.94402 |
| H | -4.49284  | 4.26494  | 0.13887  |
| H | 4.32262   | 6.79839  | 0.99776  |
| H | 11.05845  | 2.81299  | 1.46956  |
| H | -0.97913  | 2.27017  | -0.82419 |

### 2N3<sub>l...l</sub>M2

|    |          |          |          |
|----|----------|----------|----------|
| I  | 8.22386  | -1.07357 | 0.70467  |
| I  | 3.37695  | 2.59667  | 0.91339  |
| O  | 3.41518  | -2.27632 | -0.05391 |
| O  | 10.25067 | 1.70095  | -0.49619 |
| N  | 5.05415  | -0.10895 | 0.85019  |
| O  | 5.30220  | 5.19091  | -0.56169 |
| O  | 10.30904 | 1.66665  | 1.67726  |
| C  | 7.34380  | 0.81767  | 0.75158  |
| O  | 5.38957  | 5.39395  | 1.59317  |
| C  | 5.43311  | 2.29733  | 0.78182  |
| N  | 3.11369  | -3.85269 | 1.48118  |
| H  | 2.51399  | -4.30683 | 0.82231  |
| N  | 5.23675  | -0.86400 | 1.85526  |
| C  | 8.18698  | 1.94433  | 0.65913  |
| C  | 5.93899  | 0.99302  | 0.85184  |
| O  | 2.74291  | -5.52652 | 2.96884  |
| C  | 6.25893  | 3.41459  | 0.66271  |
| C  | 7.62292  | 3.21984  | 0.60250  |
| C  | 4.54243  | -2.03028 | 2.02984  |
| C  | 3.67250  | -2.65155 | 1.09355  |
| C  | 9.68118  | 1.73998  | 0.61310  |
| C  | 5.63475  | 4.78745  | 0.57084  |
| N  | 4.13654  | -3.87172 | 3.51944  |
| H  | 4.30589  | -4.31959 | 4.39737  |
| C  | 3.30317  | -4.48122 | 2.68196  |
| C  | 4.79356  | -2.66808 | 3.28654  |
| H  | 8.26992  | 4.09678  | 0.58073  |
| O  | 5.57130  | -2.25085 | 4.18081  |
| H  | 6.04434  | -1.43939 | 3.83763  |
| Cd | 3.37134  | -0.12606 | -0.72836 |

|    |           |          |          |
|----|-----------|----------|----------|
| I  | -0.77149  | -2.74491 | -0.37177 |
| I  | -5.61842  | 0.92535  | -0.16304 |
| O  | -5.58017  | -3.94764 | -1.13033 |
| O  | 1.25532   | 0.02962  | -1.57261 |
| N  | -3.94120  | -1.78027 | -0.22622 |
| O  | -3.69314  | 3.51960  | -1.63809 |
| O  | 1.31370   | -0.00467 | 0.60084  |
| C  | -1.65155  | -0.85366 | -0.32484 |
| O  | -3.60577  | 3.72263  | 0.51675  |
| C  | -3.56224  | 0.62600  | -0.29461 |
| N  | -5.88167  | -5.52401 | 0.40476  |
| H  | -6.48137  | -5.97814 | -0.25412 |
| N  | -3.75860  | -2.53534 | 0.77884  |
| C  | -0.80839  | 0.27301  | -0.41730 |
| C  | -3.05637  | -0.67829 | -0.22458 |
| O  | -6.25242  | -7.19784 | 1.89242  |
| C  | -2.73642  | 1.74325  | -0.41370 |
| C  | -1.37242  | 1.54850  | -0.47392 |
| C  | -4.45292  | -3.70162 | 0.95342  |
| C  | -5.32286  | -4.32287 | 0.01714  |
| C  | 0.68581   | 0.06866  | -0.46332 |
| C  | -3.36058  | 3.11613  | -0.50557 |
| N  | -4.85882  | -5.54307 | 2.44302  |
| H  | -4.68946  | -5.99092 | 3.32094  |
| C  | -5.69218  | -6.15255 | 1.60553  |
| C  | -4.20180  | -4.33939 | 2.21012  |
| I  | -0.12617  | 3.23767  | -0.51585 |
| O  | -3.42404  | -3.92218 | 3.10440  |
| H  | -2.95101  | -3.11072 | 2.76121  |
| Cd | -5.62401  | -1.79739 | -1.80478 |
| O  | 4.49414   | -0.72975 | -2.67442 |
| O  | 4.43428   | 1.39930  | -2.27973 |
| O  | -7.74003  | -1.64171 | -2.64902 |
| O  | -7.68166  | -1.67600 | -0.47558 |
| C  | -9.80373  | -1.39832 | -1.49371 |
| C  | -8.30952  | -1.60267 | -1.53973 |
| O  | -4.50122  | -2.40107 | -3.75084 |
| O  | -4.56107  | -0.27203 | -3.35616 |
| C  | -3.79099  | -0.95268 | -5.47348 |
| C  | -4.29021  | -1.21425 | -4.07166 |
| C  | 5.20435   | 0.71865  | -4.39708 |
| C  | 4.70514   | 0.45707  | -2.99524 |
| H  | -10.30452 | -2.36475 | -1.55118 |
| H  | -10.11179 | -0.77878 | -2.33594 |
| H  | -10.07422 | -0.90383 | -0.56078 |
| H  | -2.88503  | -0.34820 | -5.42962 |
| H  | -4.55620  | -0.42007 | -6.03816 |
| H  | -3.57163  | -1.90106 | -5.96389 |
| H  | 6.11031   | 1.32312  | -4.35322 |
| H  | 4.43914   | 1.25126  | -4.96175 |
| H  | 5.42370   | -0.22973 | -4.88749 |
| H  | -4.05142  | 4.61651  | 0.56494  |
| H  | 4.94393   | 6.28783  | 1.64137  |

|                              |          |          |          |
|------------------------------|----------|----------|----------|
| H                            | 11.30452 | 1.70467  | 1.76402  |
| <b>2N4<sub>1...1</sub>M1</b> |          |          |          |
| Cd                           | 6.94483  | 0.10498  | 1.92817  |
| I                            | 6.66910  | -4.11826 | 1.28933  |
| H                            | 8.06711  | 0.39939  | -1.68138 |
| H                            | 2.03881  | -2.11959 | 0.01705  |
| I                            | 2.25487  | -7.16392 | -1.33386 |
| O                            | 7.41906  | 1.15973  | -1.63777 |
| O                            | 5.02965  | -7.22101 | 1.06409  |
| O                            | 6.63746  | 1.71810  | 0.41637  |
| O                            | 5.51318  | -1.12182 | 0.65059  |
| O                            | 8.85871  | -0.59952 | 0.62588  |
| O                            | 3.92773  | -1.35500 | 2.22303  |
| O                            | -1.30564 | -5.69586 | -0.99140 |
| N                            | 0.21677  | -3.48631 | -1.80052 |
| C                            | 6.80447  | 1.89862  | -0.81420 |
| C                            | -1.62780 | -2.59075 | -2.93793 |
| N                            | 0.84637  | -4.35889 | -1.05871 |
| H                            | 0.37254  | -5.19961 | -0.79668 |
| C                            | 6.19882  | 3.14568  | -1.40748 |
| O                            | -2.80171 | -2.52954 | -3.19245 |
| C                            | 2.96598  | -5.31357 | -0.59291 |
| O                            | 5.70753  | -6.86090 | -1.02387 |
| C                            | 4.49648  | -1.70331 | 1.18202  |
| C                            | -1.04656 | -3.67886 | -2.12494 |
| C                            | 3.96503  | -2.93176 | 0.47708  |
| C                            | 2.66934  | -3.00564 | -0.05678 |
| C                            | 5.06092  | -6.55460 | 0.03592  |
| C                            | -1.85656 | -4.83897 | -1.65012 |
| C                            | 4.73484  | -4.09793 | 0.46942  |
| C                            | 2.15933  | -4.16371 | -0.61722 |
| C                            | 4.23737  | -5.30566 | -0.05126 |
| C                            | -0.72111 | -1.46990 | -3.39910 |
| H                            | -1.22632 | -0.88783 | -4.16985 |
| H                            | 0.20177  | -1.88951 | -3.79949 |
| H                            | -0.48878 | -0.82378 | -2.55256 |
| C                            | -3.34654 | -4.91592 | -1.90167 |
| H                            | -3.74758 | -5.81696 | -1.43755 |
| H                            | -3.52745 | -4.95056 | -2.97599 |
| H                            | -3.83260 | -4.03651 | -1.47922 |
| H                            | 5.83947  | -7.00665 | 1.61020  |
| H                            | 9.30874  | 0.19630  | 1.03105  |
| H                            | 9.35139  | -1.40515 | 0.95490  |
| O                            | 6.47060  | -0.94976 | 5.49412  |
| O                            | 7.25223  | -1.50813 | 3.43997  |
| O                            | 8.37649  | 1.33180  | 3.20577  |
| O                            | 5.03095  | 0.80951  | 3.23045  |
| O                            | 9.96194  | 1.56497  | 1.63333  |
| C                            | 7.08521  | -1.68865 | 4.67054  |
| C                            | 7.69085  | -2.93568 | 5.26382  |
| C                            | 9.39319  | 1.91329  | 2.67433  |
| C                            | 9.92464  | 3.14173  | 3.37926  |
| H                            | 4.58093  | 0.01367  | 2.82531  |

|    |          |          |          |
|----|----------|----------|----------|
| H  | 4.53828  | 1.61511  | 2.90145  |
| H  | 5.82256  | -0.18942 | 5.53771  |
| Cd | -6.01847 | 0.50804  | -2.74677 |
| H  | -4.89618 | 0.80244  | -6.35632 |
| O  | -5.54422 | 1.56278  | -6.31272 |
| O  | -6.32585 | 2.12114  | -4.25857 |
| O  | -7.45013 | -0.71877 | -4.02437 |
| O  | -4.10459 | -0.19646 | -4.04906 |
| O  | -9.03559 | -0.95195 | -2.45191 |
| C  | -6.15885 | 2.30167  | -5.48914 |
| C  | -6.76448 | 3.54872  | -6.08243 |
| C  | -8.46684 | -1.30026 | -3.49292 |
| C  | -8.99827 | -2.52870 | -4.19785 |
| H  | -3.65457 | 0.59937  | -3.64391 |
| H  | -3.61192 | -1.00208 | -3.72005 |
| I  | -2.67603 | -0.99733 | 0.38071  |
| I  | -5.74274 | 4.73129  | -2.10792 |
| I  | -0.52239 | 1.90343  | -0.90475 |
| I  | -8.13849 | -3.52380 | 0.40001  |
| I  | -3.49468 | -6.71011 | 2.39443  |
| I  | -1.32852 | 7.77694  | 0.51526  |
| O  | -6.49270 | -0.54672 | 0.81917  |
| O  | -4.10328 | 7.83404  | -1.88271 |
| O  | -5.71108 | -1.10507 | -1.23497 |
| O  | -4.58682 | 1.73484  | -1.46917 |
| O  | -7.93234 | 1.21255  | -1.44449 |
| O  | -3.00135 | 1.96801  | -3.04164 |
| N  | -1.39219 | -3.10100 | 2.53546  |
| C  | -3.90857 | -2.60587 | 0.90366  |
| O  | -6.87397 | -6.80349 | 1.07061  |
| C  | -6.11154 | -3.61197 | 0.84877  |
| O  | 0.09743  | -5.35824 | 1.79702  |
| O  | 2.23200  | 6.30888  | 0.17279  |
| N  | 0.70962  | 4.09937  | 0.98193  |
| C  | -5.87808 | -1.28561 | -0.00442 |
| C  | 2.55417  | 3.20379  | 2.11934  |
| N  | 0.08000  | 4.97191  | 0.24013  |
| H  | 0.55382  | 5.81263  | -0.02193 |
| O  | -6.85930 | -5.81081 | 3.06071  |
| C  | -5.27244 | -2.53264 | 0.58887  |
| C  | -4.22606 | -4.87177 | 1.69288  |
| O  | 3.72808  | 3.14256  | 2.37386  |
| O  | 1.44564  | -2.42071 | 4.37890  |
| C  | -2.03960 | 5.92662  | -0.22568 |
| N  | -2.00777 | -3.95355 | 1.76546  |
| H  | -1.50751 | -4.72600 | 1.37423  |
| O  | -4.78116 | 7.47395  | 0.20526  |
| C  | -3.57010 | 2.31634  | -2.00062 |
| C  | 1.97292  | 4.29190  | 1.30636  |
| C  | -5.58877 | -4.77980 | 1.40764  |
| C  | -3.03867 | 3.54478  | -1.29568 |
| C  | 0.62187  | -4.54676 | 2.53206  |
| C  | -1.74297 | 3.61867  | -0.76185 |

|   |          |          |          |
|---|----------|----------|----------|
| C | -0.16298 | -3.30204 | 2.91225  |
| C | 0.42525  | -2.24850 | 3.78163  |
| C | -4.13456 | 7.16763  | -0.85450 |
| C | 2.78294  | 5.45199  | 0.83152  |
| C | -3.80847 | 4.71095  | -1.28800 |
| C | -1.23295 | 4.77675  | -0.20137 |
| C | -3.31099 | 5.91870  | -0.76734 |
| C | -0.31975 | -0.94049 | 3.86386  |
| H | -0.47370 | -0.54679 | 2.85917  |
| H | -1.28521 | -1.10309 | 4.34297  |
| H | 0.26256  | -0.22885 | 4.44916  |
| C | -3.38394 | -3.78796 | 1.48342  |
| C | 1.64747  | 2.08293  | 2.58050  |
| H | 2.15269  | 1.50085  | 3.35124  |
| H | 0.72460  | 2.50256  | 2.98090  |
| H | 1.41514  | 1.43680  | 1.73395  |
| C | 4.27291  | 5.52895  | 1.08308  |
| H | 4.67395  | 6.42998  | 0.61895  |
| H | 4.45382  | 5.56360  | 2.15741  |
| H | 4.75896  | 4.64954  | 0.66061  |
| C | -6.51414 | -5.90174 | 1.79578  |
| C | 1.99561  | -4.74189 | 2.99021  |
| H | 2.45225  | -5.55884 | 2.43150  |
| H | 2.56476  | -3.82665 | 2.82746  |
| H | 1.99287  | -4.98478 | 4.05281  |
| H | -4.91310 | 7.61967  | -2.42880 |
| H | -7.39089 | -6.61114 | 3.33797  |
| H | -8.38238 | 0.41674  | -1.84965 |
| H | -8.42503 | 2.01816  | -1.77351 |
| H | -7.14076 | 0.21362  | 0.86277  |
| H | -7.08958 | 3.34477  | -7.10262 |
| H | -6.02067 | 4.34543  | -6.09049 |
| H | -7.62095 | 3.85726  | -5.48297 |
| H | -8.24031 | -3.31188 | -4.18411 |
| H | -9.24299 | -2.27794 | -5.23000 |
| H | -9.89442 | -2.88134 | -3.68736 |
| H | 9.50405  | 4.03552  | 2.91844  |
| H | 11.01116 | 3.16690  | 3.29591  |
| H | 9.64161  | 3.10784  | 4.43130  |
| H | 8.76148  | -2.78781 | 5.40509  |
| H | 7.52595  | -3.77595 | 4.58939  |
| H | 7.22286  | -3.14464 | 6.22580  |
| H | 5.15748  | 2.95559  | -1.66735 |
| H | 6.75152  | 3.42695  | -2.30384 |
| H | 6.24974  | 3.95580  | -0.68004 |

### 2N4<sub>1...1</sub>M2

|    |         |          |          |
|----|---------|----------|----------|
| Cd | 7.15824 | 0.31454  | 0.43401  |
| I  | 6.77577 | -3.75867 | 1.69203  |
| H  | 7.63668 | -1.00329 | -3.08870 |
| I  | 1.42582 | -1.31343 | 0.24461  |
| I  | 1.97310 | -7.28679 | 1.33259  |
| O  | 7.00605 | -0.24847 | -3.26912 |
| O  | 5.12211 | -6.54415 | 3.06029  |

|    |          |          |          |
|----|----------|----------|----------|
| O  | 6.59302  | 1.16986  | -1.54869 |
| O  | 5.52649  | -1.22398 | 0.03750  |
| O  | 8.81691  | -1.00642 | -0.73181 |
| O  | 4.23818  | -0.66452 | 1.78902  |
| O  | -1.47385 | -5.55245 | 1.57817  |
| N  | -0.11507 | -3.99840 | -0.31739 |
| C  | 6.54381  | 0.80905  | -2.74960 |
| C  | -2.12913 | -3.52477 | -1.42076 |
| N  | 0.63378  | -4.52669 | 0.61438  |
| H  | 0.21265  | -5.14481 | 1.27813  |
| C  | 5.84434  | 1.73679  | -3.71084 |
| O  | -3.32940 | -3.48907 | -1.48905 |
| C  | 2.80207  | -5.35361 | 1.10001  |
| O  | 5.42712  | -7.13653 | 0.93783  |
| C  | 4.61752  | -1.45520 | 0.91757  |
| C  | -1.41555 | -4.21522 | -0.32676 |
| C  | 3.97174  | -2.82295 | 0.89120  |
| C  | 2.60303  | -3.01701 | 0.64984  |
| C  | 4.97437  | -6.37039 | 1.85605  |
| C  | -2.13079 | -5.00957 | 0.71480  |
| C  | 4.72852  | -3.93954 | 1.25605  |
| C  | 2.00345  | -4.26241 | 0.71931  |
| C  | 4.14819  | -5.21431 | 1.38002  |
| C  | -1.31630 | -2.76741 | -2.44876 |
| H  | -1.94767 | -2.52358 | -3.30317 |
| H  | -0.47696 | -3.38207 | -2.77403 |
| H  | -0.94049 | -1.84655 | -2.00281 |
| C  | -3.64181 | -5.07467 | 0.75729  |
| H  | -3.95617 | -5.66869 | 1.61545  |
| H  | -4.00653 | -5.53991 | -0.15847 |
| H  | -4.04713 | -4.06615 | 0.83919  |
| H  | 6.01446  | -6.18201 | 3.32967  |
| H  | 9.33046  | -0.14956 | -0.77733 |
| H  | 9.35923  | -1.63579 | -0.17521 |
| O  | 7.31044  | 0.87755  | 4.13714  |
| O  | 7.72349  | -0.54079 | 2.41670  |
| O  | 8.79001  | 1.85307  | 0.83053  |
| O  | 5.49958  | 1.63550  | 1.59980  |
| O  | 10.07832 | 1.29360  | -0.92100 |
| C  | 7.77270  | -0.17998 | 3.61761  |
| C  | 8.47216  | -1.10770 | 4.57884  |
| C  | 9.69898  | 2.08428  | -0.04956 |
| C  | 10.34476 | 3.45202  | -0.02318 |
| H  | 4.98604  | 0.77864  | 1.64536  |
| H  | 4.95726  | 2.26485  | 1.04323  |
| H  | 6.67981  | 1.63235  | 3.95670  |
| Cd | -6.41990 | -0.31454 | -1.86875 |
| H  | -5.94145 | -1.63237 | -5.39146 |
| O  | -6.57208 | -0.87757 | -5.57189 |
| O  | -6.98513 | 0.54077  | -3.85144 |
| O  | -8.05166 | -1.85308 | -2.26527 |
| O  | -4.76124 | -1.63550 | -3.03456 |
| O  | -9.33998 | -1.29361 | -0.51373 |



|   |          |          |          |
|---|----------|----------|----------|
| C | -7.03436 | 0.17997  | -5.05235 |
| C | -7.73381 | 1.10770  | -6.01360 |
| C | -8.96064 | -2.08429 | -1.38518 |
| C | -9.60641 | -3.45201 | -1.41156 |
| H | -4.24770 | -0.77864 | -3.08011 |
| H | -4.21892 | -2.26486 | -2.47798 |
| H | -3.12328 | -1.17343 | 1.67517  |
| I | -6.03742 | 3.75867  | -3.12677 |
| I | -0.68745 | 1.31342  | -1.67936 |
| I | -7.96128 | -2.50337 | 2.97745  |
| I | -3.04169 | -4.90185 | 5.37330  |
| I | -1.23476 | 7.28679  | -2.76733 |
| O | -6.26771 | 0.24846  | 1.83438  |
| O | -4.38376 | 6.54414  | -4.49506 |
| O | -5.85466 | -1.16987 | 0.11394  |
| O | -4.78815 | 1.22399  | -1.47222 |
| O | -8.07856 | 1.00642  | -0.70295 |
| O | -3.49982 | 0.66450  | -3.22377 |
| N | -0.94665 | -1.72649 | 3.64301  |
| C | -3.70816 | -1.77224 | 2.37334  |
| O | -6.59952 | -5.28946 | 4.76303  |
| C | -5.88720 | -2.54524 | 3.09625  |
| O | 0.39211  | -4.18890 | 3.70344  |
| O | 2.21220  | 5.55244  | -3.01292 |
| N | 0.85346  | 3.99843  | -1.11736 |
| C | -5.80544 | -0.80908 | 1.31484  |
| C | 2.86749  | 3.52478  | -0.01398 |
| N | 0.10459  | 4.52669  | -2.04911 |
| H | 0.52571  | 5.14480  | -2.71288 |
| O | -6.23950 | -3.56259 | 6.11744  |
| C | -5.10598 | -1.73680 | 2.27608  |
| C | -3.88378 | -3.47406 | 4.08533  |
| O | 4.06776  | 3.48907  | 0.05432  |
| O | 2.16817  | -0.55096 | 4.55424  |
| C | -2.06370 | 5.35363  | -2.53476 |
| N | -1.68659 | -2.77446 | 3.41294  |
| H | -1.26187 | -3.67408 | 3.31148  |
| O | -4.68877 | 7.13654  | -2.37259 |
| C | -3.87916 | 1.45520  | -2.35232 |
| C | 2.15390  | 4.21524  | -1.10798 |
| C | -5.27532 | -3.40942 | 4.00633  |
| C | -3.23339 | 2.82294  | -2.32594 |
| C | 1.03622  | -3.18601 | 3.93401  |
| C | -1.86468 | 3.01700  | -2.08461 |
| C | 0.32931  | -1.84208 | 3.87082  |
| C | 1.05957  | -0.56859 | 4.10896  |
| C | -4.23602 | 6.37040  | -3.29078 |
| C | 2.86916  | 5.00957  | -2.14955 |
| C | -3.99016 | 3.93954  | -2.69078 |
| C | -1.26508 | 4.26242  | -2.15406 |
| C | -3.40983 | 5.21432  | -2.81477 |
| C | 0.34017  | 0.70576  | 3.74681  |
| H | 0.01409  | 0.65572  | 2.70793  |

|   |           |          |          |
|---|-----------|----------|----------|
| H | -0.52743  | 0.82865  | 4.39510  |
| H | 1.01527   | 1.55159  | 3.87682  |
| C | -3.09083  | -2.64077 | 3.30781  |
| C | 2.05465   | 2.76741  | 1.01401  |
| H | 2.68603   | 2.52357  | 1.86841  |
| H | 1.21533   | 3.38210  | 1.33928  |
| H | 1.67885   | 1.84654  | 0.56806  |
| C | 4.38017   | 5.07467  | -2.19203 |
| H | 4.69452   | 5.66868  | -3.05019 |
| H | 4.74488   | 5.53993  | -1.27627 |
| H | 4.78547   | 4.06615  | -2.27394 |
| C | -6.11923  | -4.19679 | 4.97255  |
| C | 2.46864   | -3.27299 | 4.20920  |
| H | 2.82133   | -4.27945 | 3.98392  |
| H | 3.00089   | -2.55301 | 3.58757  |
| H | 2.65046   | -3.05067 | 5.26069  |
| H | -5.27611  | 6.18200  | -4.76442 |
| H | -6.71487  | -4.13353 | 6.78680  |
| H | -8.59211  | 0.14957  | -0.65742 |
| H | -8.62089  | 1.63577  | -1.25954 |
| H | -6.89835  | 1.00327  | 1.65396  |
| H | -8.23112  | 0.52212  | -6.78680 |
| H | -7.00270  | 1.77183  | -6.47456 |
| H | -8.47317  | 1.69968  | -5.47416 |
| H | -8.85758  | -4.21172 | -1.18759 |
| H | -10.02664 | -3.63637 | -2.40025 |
| H | -10.40030 | -3.49339 | -0.66586 |
| H | 9.85054   | 4.10114  | -0.74602 |
| H | 11.40030  | 3.36040  | -0.27921 |
| H | 10.24872  | 3.87993  | 0.97467  |
| H | 9.55106   | -0.99345 | 4.47394  |
| H | 8.19265   | -2.13783 | 4.35795  |
| H | 8.17832   | -0.86236 | 5.59940  |
| H | 4.77369   | 1.53278  | -3.69856 |
| H | 6.23299   | 1.57808  | -4.71673 |
| H | 6.02080   | 2.77003  | -3.41195 |

### 2N4<sub>l...l</sub>M3

|    |          |          |          |
|----|----------|----------|----------|
| Cd | 7.05103  | 0.56719  | 0.73403  |
| I  | 6.66856  | -3.69064 | 0.52307  |
| H  | 7.52947  | 0.53367  | -3.02695 |
| I  | 1.31860  | -0.89783 | -0.00074 |
| I  | 1.86588  | -6.88306 | -1.02138 |
| O  | 6.89884  | 1.30467  | -2.93833 |
| O  | 5.01490  | -6.77611 | 0.85612  |
| O  | 6.48581  | 2.04906  | -0.83655 |
| O  | 5.41928  | -0.74294 | -0.16477 |
| O  | 8.70970  | -0.27537 | -0.81327 |
| O  | 4.13097  | -0.81627 | 1.67247  |
| O  | -1.58107 | -5.33731 | -0.19743 |
| N  | -0.22229 | -3.22866 | -1.44716 |
| C  | 6.43660  | 2.12074  | -2.08844 |
| C  | -2.23635 | -2.40621 | -2.32200 |
| N  | 0.52656  | -4.04377 | -0.75227 |

|    |          |          |          |
|----|----------|----------|----------|
| H  | 0.10543  | -4.85163 | -0.33995 |
| C  | 5.73713  | 3.32129  | -2.67440 |
| O  | -3.43662 | -2.34931 | -2.37396 |
| C  | 2.69485  | -4.98692 | -0.57876 |
| O  | 5.31991  | -6.60685 | -1.34095 |
| C  | 4.51031  | -1.26121 | 0.58314  |
| C  | -1.52277 | -3.42920 | -1.53012 |
| C  | 3.86452  | -2.53745 | 0.09057  |
| C  | 2.49581  | -2.63726 | -0.20261 |
| C  | 4.86716  | -6.20096 | -0.21607 |
| C  | -2.23801 | -4.53188 | -0.82306 |
| C  | 4.62131  | -3.71150 | 0.05152  |
| C  | 1.89623  | -3.83132 | -0.56328 |
| C  | 4.04098  | -4.95179 | -0.26799 |
| C  | -1.42352 | -1.34294 | -3.02897 |
| H  | -2.05489 | -0.82158 | -3.74846 |
| H  | -0.58418 | -1.80928 | -3.54485 |
| H  | -1.04771 | -0.63013 | -2.29496 |
| C  | -3.74903 | -4.60758 | -0.80539 |
| H  | -4.06339 | -5.45928 | -0.20216 |
| H  | -4.11375 | -4.73156 | -1.82506 |
| H  | -4.15435 | -3.68789 | -0.38350 |
| H  | 5.90725  | -6.52795 | 1.23312  |
| H  | 9.22325  | 0.54538  | -0.56298 |
| H  | 9.25202  | -1.05716 | -0.50550 |
| O  | 7.20323  | -0.17029 | 4.40641  |
| O  | 7.61628  | -0.91468 | 2.30462  |
| O  | 8.68280  | 1.87733  | 1.63285  |
| O  | 5.39237  | 1.40977  | 2.28132  |
| O  | 9.97111  | 1.95065  | -0.20440 |
| C  | 7.66549  | -0.98637 | 3.55650  |
| C  | 8.36495  | -2.18690 | 4.14247  |
| C  | 9.59177  | 2.39560  | 0.88492  |
| C  | 10.23755 | 3.67183  | 1.37750  |
| H  | 4.87883  | 0.58900  | 2.03106  |
| H  | 4.85005  | 2.19152  | 1.97356  |
| H  | 6.57260  | 0.60070  | 4.49501  |
| Cd | -6.52712 | 0.76364  | -1.64500 |
| H  | -6.04867 | 0.73013  | -5.40599 |
| O  | -6.67930 | 1.50112  | -5.31738 |
| O  | -7.09235 | 2.24550  | -3.21559 |
| O  | -8.15888 | -0.54649 | -2.54383 |
| O  | -4.86846 | -0.07892 | -3.19230 |
| O  | -9.44720 | -0.61983 | -0.70656 |
| C  | -7.14158 | 2.31719  | -4.46747 |
| C  | -7.84103 | 3.51773  | -5.05345 |
| C  | -9.06786 | -1.06477 | -1.79589 |
| C  | -9.71363 | -2.34099 | -2.28847 |
| H  | -4.35492 | 0.74184  | -2.94204 |
| H  | -4.32614 | -0.86069 | -2.88454 |
| I  | -2.69238 | -0.51815 | 0.97625  |
| I  | -6.14464 | 5.02148  | -1.43404 |
| H  | -1.36377 | 3.06954  | -0.81266 |

|   |          |          |          |
|---|----------|----------|----------|
| I | -8.06850 | -2.95068 | 2.16031  |
| I | -3.14891 | -6.02396 | 3.59134  |
| I | -1.34198 | 8.21389  | 0.11041  |
| O | -6.37493 | 0.02615  | 2.02736  |
| O | -4.49098 | 8.10695  | -1.76712 |
| O | -5.96188 | -0.71822 | -0.07443 |
| O | -4.89537 | 2.07377  | -0.74618 |
| O | -8.18578 | 1.60621  | -0.09771 |
| O | -3.60704 | 2.14709  | -2.58346 |
| N | -1.05387 | -2.44829 | 3.05144  |
| C | -3.81538 | -2.05702 | 1.84269  |
| O | -6.70674 | -6.17946 | 2.88530  |
| C | -5.99442 | -3.03067 | 2.25762  |
| O | 0.28489  | -4.78288 | 2.26603  |
| O | 2.10498  | 6.66813  | -0.71355 |
| N | 0.74624  | 4.55952  | 0.53619  |
| C | -5.91266 | -0.78992 | 1.17745  |
| C | 2.76027  | 3.73705  | 1.41103  |
| N | -0.00263 | 5.37459  | -0.15869 |
| H | 0.41849  | 6.18246  | -0.57102 |
| O | -6.34672 | -5.01997 | 4.74866  |
| C | -5.21320 | -1.99046 | 1.76342  |
| C | -3.99100 | -4.24176 | 2.86938  |
| O | 3.96055  | 3.68014  | 1.46300  |
| O | 2.06095  | -1.65532 | 4.30977  |
| C | -2.17092 | 6.31777  | -0.33222 |
| N | -1.79381 | -3.35438 | 2.47682  |
| H | -1.36909 | -4.16504 | 2.07378  |
| O | -4.79599 | 7.93769  | 0.42996  |
| C | -3.98638 | 2.59205  | -1.49412 |
| C | 2.04668  | 4.76005  | 0.61916  |
| C | -5.38254 | -4.15400 | 2.81725  |
| C | -3.34061 | 3.86828  | -1.00154 |
| C | 0.92900  | -3.91932 | 2.82570  |
| C | -1.97190 | 3.96809  | -0.70839 |
| C | 0.22209  | -2.63483 | 3.22598  |
| C | 0.95235  | -1.51958 | 3.88531  |
| C | -4.34324 | 7.53180  | -0.69489 |
| C | 2.76194  | 5.86270  | -0.08791 |
| C | -4.09738 | 5.04232  | -0.96248 |
| C | -1.37230 | 5.16216  | -0.34770 |
| C | -3.51705 | 6.28263  | -0.64299 |
| C | 0.23295  | -0.19822 | 3.98086  |
| H | -0.09313 | 0.11007  | 2.98752  |
| H | -0.63465 | -0.30447 | 4.63208  |
| H | 0.90805  | 0.55213  | 4.39232  |
| C | -3.19805 | -3.19280 | 2.42375  |
| C | 1.94743  | 2.67376  | 2.11799  |
| H | 2.57881  | 2.15241  | 2.83747  |
| H | 1.10811  | 3.14014  | 2.63388  |
| H | 1.57163  | 1.96095  | 1.38398  |
| C | 4.27296  | 5.93841  | -0.10557 |
| H | 4.58731  | 6.79011  | -0.70882 |

|   |           |          |          |
|---|-----------|----------|----------|
| H | 4.63767   | 6.06241  | 0.91409  |
| H | 4.67826   | 5.01873  | -0.52748 |
| C | -6.22645  | -5.22435 | 3.45590  |
| C | 2.36142   | -4.09518 | 3.05455  |
| H | 2.71411   | -4.96390 | 2.49863  |
| H | 2.89367   | -3.20601 | 2.71665  |
| H | 2.54324   | -4.24590 | 4.11866  |
| H | -5.38333  | 7.85877  | -2.14410 |
| H | -6.82209  | -5.78542 | 5.18237  |
| H | -8.69933  | 0.78546  | -0.34799 |
| H | -8.72811  | 2.38798  | -0.40549 |
| H | -7.00557  | 0.79715  | 2.11598  |
| H | -8.33834  | 3.23192  | -5.98031 |
| H | -7.10992  | 4.29947  | -5.25947 |
| H | -8.58039  | 3.88952  | -4.34408 |
| H | -8.96480  | -3.13149 | -2.33784 |
| H | -10.13386 | -2.17607 | -3.28059 |
| H | -10.50752 | -2.63491 | -1.60188 |
| H | 9.74333   | 4.52903  | 0.92027  |
| H | 11.29309  | 3.67331  | 1.10558  |
| H | 10.14151  | 3.73265  | 2.46153  |
| H | 9.44385   | -2.04366 | 4.08297  |
| H | 8.08544   | -3.07935 | 3.58258  |
| H | 8.07111   | -2.30540 | 5.18539  |
| H | 4.66648   | 3.12539  | -2.73265 |
| H | 6.12578   | 3.51619  | -3.67392 |
| H | 5.91359   | 4.18999  | -2.04015 |

#### 2N4<sub>1...1</sub>M4

|    |          |          |          |
|----|----------|----------|----------|
| Cd | 7.07815  | -0.22945 | 1.41474  |
| I  | 6.74780  | -4.15030 | -0.26983 |
| H  | 7.88157  | 1.01090  | -2.07684 |
| I  | 1.44246  | -1.22634 | -0.25622 |
| I  | 2.12174  | -6.51540 | -3.21065 |
| O  | 7.23979  | 1.71948  | -1.78352 |
| O  | 5.09495  | -7.12623 | -1.15160 |
| O  | 6.64019  | 1.71156  | 0.40339  |
| O  | 5.54060  | -1.11734 | -0.01161 |
| O  | 8.87126  | -0.53100 | -0.18186 |
| O  | 4.09824  | -1.78377 | 1.57459  |
| O  | -1.39537 | -5.26598 | -2.20141 |
| N  | 0.05073  | -2.88876 | -2.53628 |
| C  | 6.69932  | 2.20698  | -0.74807 |
| C  | -1.88596 | -1.77206 | -3.24368 |
| N  | 0.74258  | -3.90867 | -2.10132 |
| H  | 0.29340  | -4.79899 | -2.02688 |
| C  | 6.04427  | 3.55085  | -0.94520 |
| O  | -3.07758 | -1.67379 | -3.37392 |
| C  | 2.89472  | -4.90310 | -2.07863 |
| O  | 5.58828  | -6.22475 | -3.12461 |
| C  | 4.57409  | -1.83897 | 0.43485  |
| C  | -1.23608 | -3.01960 | -2.79194 |
| C  | 3.98322  | -2.85580 | -0.51668 |
| C  | 2.64593  | -2.81874 | -0.94043 |

|    |          |          |          |
|----|----------|----------|----------|
| C  | 5.03650  | -6.21672 | -1.97111 |
| C  | -2.00161 | -4.28087 | -2.56711 |
| C  | 4.74944  | -3.96289 | -0.89069 |
| C  | 2.08902  | -3.80436 | -1.73652 |
| C  | 4.20848  | -5.00644 | -1.66242 |
| C  | -1.02292 | -0.55004 | -3.47368 |
| H  | -1.59338 | 0.19953  | -4.02215 |
| H  | -0.13844 | -0.83130 | -4.04525 |
| H  | -0.71768 | -0.13897 | -2.51142 |
| C  | -3.50784 | -4.32396 | -2.70365 |
| H  | -3.86691 | -5.32301 | -2.45649 |
| H  | -3.78170 | -4.08450 | -3.73114 |
| H  | -3.95523 | -3.59439 | -2.02861 |
| H  | 5.94929  | -7.04171 | -0.63880 |
| H  | 9.35489  | 0.14339  | 0.37611  |
| H  | 9.39073  | -1.38290 | -0.11525 |
| O  | 6.91653  | -2.17837 | 4.61301  |
| O  | 7.51615  | -2.17046 | 2.42608  |
| O  | 8.61572  | 0.65845  | 2.84111  |
| O  | 5.28506  | 0.07212  | 3.01132  |
| O  | 10.05809 | 1.32487  | 1.25490  |
| C  | 7.45702  | -2.66588 | 3.57754  |
| C  | 8.11206  | -4.00973 | 3.77468  |
| C  | 9.58224  | 1.38008  | 2.39463  |
| C  | 10.17310 | 2.39690  | 3.34616  |
| H  | 4.80144  | -0.60229 | 2.45339  |
| H  | 4.76559  | 0.92399  | 2.94472  |
| H  | 6.27475  | -1.46980 | 4.90630  |
| Cd | -6.24326 | 1.07281  | -1.88808 |
| H  | -5.43983 | 2.31316  | -5.37965 |
| O  | -6.08161 | 3.02173  | -5.08636 |
| O  | -6.68123 | 3.01380  | -2.89943 |
| O  | -7.78082 | 0.18491  | -3.31444 |
| O  | -4.45017 | 0.77126  | -3.48466 |
| O  | -9.22320 | -0.48152 | -1.72823 |
| C  | -6.62212 | 3.50923  | -4.05088 |
| C  | -7.27716 | 4.85310  | -4.24803 |
| C  | -8.74734 | -0.53672 | -2.86797 |
| C  | -9.33819 | -1.55353 | -3.81949 |
| H  | -3.96655 | 1.44566  | -2.92673 |
| H  | -3.93070 | -0.08062 | -3.41807 |
| I  | -2.64096 | -1.11224 | 0.45034  |
| I  | -5.91290 | 4.99366  | -0.20350 |
| I  | -0.60755 | 2.06970  | -0.21713 |
| H  | -7.10235 | -3.75458 | 0.38819  |
| I  | -3.28099 | -7.16803 | 0.97838  |
| I  | -1.28686 | 7.35876  | 2.73731  |
| O  | -6.40490 | -0.87612 | 1.31018  |
| O  | -4.26005 | 7.96961  | 0.67824  |
| O  | -5.80528 | -0.86819 | -0.87674 |
| O  | -4.70571 | 1.96070  | -0.46171 |
| O  | -8.03635 | 1.37437  | -0.29150 |
| O  | -3.26332 | 2.62712  | -2.04795 |

|   |          |          |          |
|---|----------|----------|----------|
| N | -1.17420 | -3.67083 | 1.87119  |
| C | -3.82323 | -2.82860 | 0.64098  |
| O | -6.76280 | -6.99313 | -0.03515 |
| C | -6.02261 | -3.83596 | 0.51323  |
| O | 0.24539  | -5.62716 | 0.45100  |
| O | 2.23027  | 6.10934  | 1.72806  |
| N | 0.78421  | 3.73215  | 2.06296  |
| C | -5.86439 | -1.36362 | 0.27470  |
| C | 2.72086  | 2.61543  | 2.77035  |
| N | 0.09233  | 4.75202  | 1.62799  |
| H | 0.54151  | 5.64235  | 1.55353  |
| O | -6.57474 | -6.54706 | 2.13551  |
| C | -5.20935 | -2.70748 | 0.47185  |
| C | -4.07073 | -5.22795 | 0.84068  |
| O | 3.91250  | 2.51714  | 2.90059  |
| O | 1.81349  | -3.42501 | 3.58221  |
| C | -2.05981 | 5.74648  | 1.60530  |
| N | -1.85455 | -4.30969 | 0.96142  |
| H | -1.39030 | -4.94367 | 0.34293  |
| O | -4.75337 | 7.06813  | 2.65126  |
| C | -3.73918 | 2.68234  | -0.90819 |
| C | 2.07097  | 3.86297  | 2.31862  |
| C | -5.45311 | -5.09630 | 0.70473  |
| C | -3.14833 | 3.69915  | 0.04334  |
| C | 0.83189  | -5.02102 | 1.32417  |
| C | -1.81104 | 3.66211  | 0.46707  |
| C | 0.08316  | -3.93444 | 2.07824  |
| C | 0.74493  | -3.12769 | 3.13796  |
| C | -4.20160 | 7.06009  | 1.49779  |
| C | 2.83653  | 5.12424  | 2.09376  |
| C | -3.91453 | 4.80624  | 0.41736  |
| C | -1.25411 | 4.64773  | 1.26318  |
| C | -3.37357 | 5.84981  | 1.18908  |
| C | 0.00993  | -1.90226 | 3.61834  |
| H | -0.23100 | -1.26641 | 2.76643  |
| H | -0.91010 | -2.20463 | 4.11856  |
| H | 0.64104  | -1.35264 | 4.31671  |
| C | -3.25007 | -4.10806 | 0.84875  |
| C | 1.85781  | 1.39341  | 3.00033  |
| H | 2.42828  | 0.64384  | 3.54879  |
| H | 0.97335  | 1.67469  | 3.57192  |
| H | 1.55259  | 0.98233  | 2.03807  |
| C | 4.34275  | 5.16732  | 2.23031  |
| H | 4.70181  | 6.16636  | 1.98315  |
| H | 4.61660  | 4.92787  | 3.25782  |
| H | 4.79013  | 4.43776  | 1.55526  |
| C | -6.34113 | -6.30097 | 0.86575  |
| C | 2.24033  | -5.29664 | 1.59888  |
| H | 2.64654  | -5.93140 | 0.81137  |
| H | 2.79314  | -4.35779 | 1.63124  |
| H | 2.33021  | -5.80529 | 2.55873  |
| H | -5.11439 | 7.88507  | 0.16545  |
| H | -7.08014 | -7.40360 | 2.23992  |

|   |           |          |          |
|---|-----------|----------|----------|
| H | -8.51998  | 0.69999  | -0.84945 |
| H | -8.55583  | 2.22625  | -0.35811 |
| H | -7.04669  | -0.16756 | 1.60349  |
| H | -7.68993  | 4.91181  | -5.25512 |
| H | -6.53688  | 5.64153  | -4.11220 |
| H | -8.07812  | 4.97724  | -3.51924 |
| H | -8.58192  | -2.29648 | -4.07278 |
| H | -9.67194  | -1.05071 | -4.72717 |
| H | -10.18644 | -2.04599 | -3.34410 |
| H | 9.71395   | 3.36956  | 3.16947  |
| H | 11.24822  | 2.46721  | 3.18099  |
| H | 9.98284   | 2.08653  | 4.37354  |
| H | 9.19093   | -3.87916 | 3.85876  |
| H | 7.88901   | -4.65119 | 2.92212  |
| H | 7.72969   | -4.47015 | 4.68566  |
| H | 4.98424   | 3.41076  | -1.15679 |
| H | 6.51674   | 4.06612  | -1.78146 |
| H | 6.15839   | 4.14695  | -0.03983 |

### 3N3r...oM1

|    |          |          |          |
|----|----------|----------|----------|
| Cd | 0.05660  | 3.30701  | -1.25337 |
| H  | -2.06209 | -1.01396 | -0.38758 |
| I  | -7.15283 | -1.97689 | 0.27801  |
| O  | -3.87997 | -5.58605 | -0.69439 |
| O  | -1.65565 | 1.92534  | -1.86467 |
| N  | -4.09359 | -2.82392 | 0.03094  |
| O  | -7.63885 | 1.11932  | -1.39224 |
| O  | -1.41662 | 2.09722  | 0.28981  |
| C  | -3.06804 | -0.60102 | -0.31238 |
| O  | -7.54202 | 1.48314  | 0.74094  |
| C  | -5.46391 | -0.81156 | -0.07458 |
| N  | -2.90222 | -6.83252 | 0.86211  |
| H  | -3.08124 | -7.61901 | 0.27102  |
| N  | -3.36594 | -3.17974 | 1.00948  |
| C  | -3.23032 | 0.78812  | -0.49354 |
| C  | -4.20123 | -1.41778 | -0.06121 |
| O  | -1.91219 | -8.20068 | 2.37875  |
| C  | -5.63450 | 0.55700  | -0.28039 |
| C  | -4.51459 | 1.33480  | -0.48738 |
| C  | -3.06187 | -4.49103 | 1.25622  |
| C  | -3.34560 | -5.60304 | 0.41820  |
| C  | -2.00804 | 1.64818  | -0.70045 |
| C  | -7.03169 | 1.13161  | -0.30266 |
| N  | -1.98295 | -6.00547 | 2.77836  |
| H  | -1.48450 | -6.15476 | 3.63233  |
| C  | -2.24023 | -7.07694 | 2.03465  |
| C  | -2.34430 | -4.69637 | 2.47770  |
| I  | -4.76319 | 3.41236  | -0.66094 |
| O  | -1.99186 | -3.79915 | 3.28360  |
| H  | -2.22839 | -2.90968 | 2.89260  |
| Cd | -5.43152 | -4.09150 | -1.35729 |
| I  | -1.66470 | 5.42161  | 0.38193  |
| O  | 1.60816  | 1.81246  | -0.59047 |
| N  | 1.39454  | 4.57458  | 0.13486  |



|    |          |           |          |
|----|----------|-----------|----------|
| O  | 1.12964  | 3.48557   | -3.30982 |
| O  | -0.33391 | 5.03116   | -2.90809 |
| I  | 7.18319  | -8.13163  | 1.70025  |
| O  | 3.91033  | -4.52247  | 2.67264  |
| N  | 4.12395  | -7.28460  | 1.94732  |
| H  | 3.36130  | -9.31802  | 2.23236  |
| C  | 5.49426  | -9.29695  | 2.05283  |
| N  | 2.93258  | -3.27600  | 1.11616  |
| H  | 3.11160  | -2.48951  | 1.70724  |
| N  | 3.39631  | -6.92877  | 0.96877  |
| C  | 4.23160  | -8.69074  | 2.03946  |
| O  | 1.94255  | -1.90783  | -0.40049 |
| H  | 5.62763  | -10.36674 | 2.21371  |
| C  | 3.09223  | -5.61750  | 0.72205  |
| C  | 3.37596  | -4.50548  | 1.56006  |
| N  | 2.01331  | -4.10304  | -0.80010 |
| H  | 1.51486  | -3.95377  | -1.65407 |
| C  | 2.27059  | -3.03157  | -0.05639 |
| C  | 2.37464  | -5.41215  | -0.49945 |
| O  | 2.02221  | -6.30937  | -1.30535 |
| H  | 2.25875  | -7.19885  | -0.91433 |
| Cd | 5.46187  | -6.01702  | 3.33555  |
| H  | 3.42603  | 6.38455   | -0.28366 |
| C  | 2.42009  | 6.79749   | -0.20846 |
| C  | 0.02421  | 6.58694   | 0.02934  |
| N  | 2.58591  | 0.56599   | 0.96603  |
| H  | 2.40688  | -0.22050  | 0.37494  |
| N  | 2.12217  | 4.21877   | 1.11340  |
| C  | 2.25781  | 8.18662   | -0.38963 |
| C  | 1.28688  | 5.98073   | 0.04271  |
| O  | 3.57594  | -0.80217  | 2.48267  |
| C  | -0.14638 | 7.95551   | -0.17647 |
| C  | 0.97355  | 8.73331   | -0.38346 |
| C  | 2.42626  | 2.90748   | 1.36014  |
| C  | 2.14252  | 1.79547   | 0.52212  |
| H  | 3.14082  | 8.80796   | -0.53910 |
| H  | -1.15435 | 8.37005   | -0.19253 |
| N  | 3.50518  | 1.39304   | 2.88228  |
| H  | 4.00362  | 1.24375   | 3.73625  |
| C  | 3.24789  | 0.32157   | 2.13857  |
| C  | 3.14384  | 2.70215   | 2.58162  |
| H  | 0.84448  | 9.81188   | -0.47357 |
| O  | 3.49628  | 3.59936   | 3.38752  |
| H  | 3.25973  | 4.48883   | 2.99651  |
| C  | 0.44840  | 4.47363   | -3.64988 |
| C  | -5.03971 | -2.92488  | -3.75379 |
| C  | 0.52142  | 4.90191   | -5.09696 |
| O  | 6.93511  | -4.80724  | 1.79236  |
| O  | 7.17413  | -4.63535  | 3.94684  |
| C  | 7.52651  | -4.35820  | 2.78262  |
| O  | 4.38886  | -6.19557  | 5.39200  |
| O  | 5.85240  | -7.74117  | 4.99027  |
| C  | 5.07008  | -7.18364  | 5.73205  |

|   |          |          |          |
|---|----------|----------|----------|
| O | -7.14378 | -5.47317 | -1.96858 |
| O | -6.90475 | -5.30129 | 0.18589  |
| C | -7.49616 | -5.75033 | -0.80437 |
| O | -4.35850 | -3.91295 | -3.41374 |
| O | -5.82204 | -2.36735 | -3.01201 |
| C | -4.96671 | -2.49659 | -5.20088 |
| H | -8.51861 | 1.56104  | -1.56790 |
| C | -8.72396 | -6.69498 | -0.58933 |
| H | -8.38868 | -7.73213 | -0.58893 |
| H | -9.44268 | -6.54575 | -1.39509 |
| H | -9.19610 | -6.46537 | 0.36586  |
| H | -4.35602 | -3.20601 | -5.75933 |
| H | -4.52021 | -1.50426 | -5.26396 |
| H | -5.97121 | -2.47059 | -5.62318 |
| C | 4.90792  | -7.73176 | 7.18785  |
| H | 5.57272  | -8.58351 | 7.33151  |
| H | 3.87600  | -8.04567 | 7.34502  |
| H | 5.16202  | -6.94808 | 7.90153  |
| C | 8.75431  | -3.41354 | 2.56760  |
| H | 8.63845  | -2.87564 | 1.62669  |
| H | 9.66818  | -4.00682 | 2.53684  |
| H | 8.81193  | -2.69986 | 3.38943  |
| H | 0.82400  | 4.05433  | -5.71185 |
| H | 1.25044  | 5.70542  | -5.20168 |
| H | -0.45750 | 5.25492  | -5.42119 |

### 3N3<sub>l...o</sub>M2

|    |          |          |          |
|----|----------|----------|----------|
| Cd | -1.18266 | 2.90089  | -1.83910 |
| I  | -1.39912 | -1.64365 | 0.01802  |
| I  | -6.64499 | -2.50512 | 2.97530  |
| O  | -3.47024 | -5.99241 | 1.41230  |
| O  | -2.80266 | 1.31358  | -1.57347 |
| N  | -3.77994 | -3.16600 | 1.75377  |
| O  | -8.08539 | 0.18961  | 1.16531  |
| O  | -1.85351 | 1.89469  | 0.29465  |
| C  | -3.24042 | -0.97753 | 0.73870  |
| O  | -7.30093 | 0.94500  | 3.03780  |
| C  | -5.35366 | -1.30865 | 1.86371  |
| N  | -1.85672 | -6.85988 | 2.66786  |
| H  | -2.12501 | -7.75218 | 2.30477  |
| N  | -2.71707 | -3.28397 | 2.43935  |
| C  | -3.63712 | 0.33979  | 0.42859  |
| C  | -4.09717 | -1.81182 | 1.50304  |
| O  | -0.22965 | -7.85313 | 3.90006  |
| C  | -5.76394 | -0.01662 | 1.53699  |
| C  | -4.89900 | 0.78667  | 0.82380  |
| C  | -2.17620 | -4.50295 | 2.74655  |
| C  | -2.58474 | -5.76713 | 2.24227  |
| C  | -2.68797 | 1.23094  | -0.33395 |
| C  | -7.14421 | 0.44449  | 1.94325  |
| N  | -0.44544 | -5.63236 | 3.97268  |
| H  | 0.33412  | -5.58683 | 4.59735  |
| C  | -0.80195 | -6.83761 | 3.53951  |
| C  | -1.05795 | -4.42946 | 3.63717  |

|    |          |          |          |
|----|----------|----------|----------|
| H  | -5.19226 | 1.81855  | 0.63062  |
| O  | -0.56851 | -3.37695 | 4.11818  |
| H  | -1.04134 | -2.59331 | 3.71528  |
| Cd | -5.33797 | -4.75787 | 1.15170  |
| I  | -2.48967 | 5.15363  | -0.01550 |
| O  | 0.68508  | 1.66635  | -1.57851 |
| N  | 0.37538  | 4.49275  | -1.23704 |
| O  | -0.92605 | 2.77359  | -4.14783 |
| O  | -2.34825 | 4.25994  | -3.46934 |
| I  | 7.96705  | -7.27088 | -0.05799 |
| O  | 4.79229  | -3.78359 | 1.50500  |
| N  | 5.10199  | -6.61000 | 1.16354  |
| H  | 4.76124  | -8.60493 | 2.00128  |
| C  | 6.67571  | -8.46736 | 1.05360  |
| N  | 3.17878  | -2.91612 | 0.24946  |
| H  | 3.44707  | -2.02382 | 0.61254  |
| N  | 4.03913  | -6.49202 | 0.47795  |
| C  | 5.41923  | -7.96418 | 1.41426  |
| O  | 1.55170  | -1.92286 | -0.98275 |
| H  | 6.99643  | -9.47732 | 1.30898  |
| C  | 3.49826  | -5.27306 | 0.17077  |
| C  | 3.90680  | -4.00887 | 0.67504  |
| N  | 1.76749  | -4.14363 | -1.05537 |
| H  | 0.98793  | -4.18918 | -1.68004 |
| C  | 2.12400  | -2.93838 | -0.62220 |
| C  | 2.37999  | -5.34654 | -0.71986 |
| O  | 1.89056  | -6.39905 | -1.20087 |
| H  | 2.36340  | -7.18270 | -0.79796 |
| Cd | 6.66002  | -5.01813 | 1.76561  |
| H  | 1.87680  | 6.33325  | -2.62859 |
| C  | 0.91489  | 6.68124  | -2.25211 |
| C  | -1.19835 | 6.35011  | -1.12710 |
| N  | 2.29859  | 0.79887  | -0.32295 |
| H  | 2.03029  | -0.09341 | -0.68604 |
| N  | 1.43823  | 4.37479  | -0.55145 |
| C  | 0.51820  | 7.99855  | -2.56222 |
| C  | 0.05813  | 5.84694  | -1.48776 |
| O  | 3.92566  | -0.19436 | 0.90925  |
| C  | -1.60863 | 7.64215  | -1.45382 |
| C  | -0.74368 | 8.44544  | -2.16701 |
| C  | 1.97911  | 3.15581  | -0.24426 |
| C  | 1.57056  | 1.89163  | -0.74854 |
| H  | 1.20388  | 8.64235  | -3.11310 |
| H  | -2.60439 | 7.97481  | -1.16073 |
| N  | 3.70988  | 2.02639  | 0.98187  |
| H  | 4.48943  | 2.07193  | 1.60655  |
| C  | 3.35336  | 0.82115  | 0.54870  |
| C  | 3.09737  | 3.22931  | 0.64636  |
| H  | -1.03694 | 9.47732  | -2.36019 |
| O  | 3.58681  | 4.28181  | 1.12737  |
| H  | 3.11397  | 5.06545  | 0.72447  |
| C  | -1.80689 | 3.63201  | -4.35576 |
| C  | -5.96219 | -4.02675 | -1.36495 |

|   |          |          |          |
|---|----------|----------|----------|
| C | -2.29924 | 3.79122  | -5.77528 |
| O | 7.33088  | -4.01194 | -0.36816 |
| O | 8.28002  | -3.43082 | 1.49997  |
| C | 8.16533  | -3.34819 | 0.26045  |
| O | 6.40343  | -4.89083 | 4.07433  |
| O | 7.82562  | -6.37718 | 3.39584  |
| C | 7.28425  | -5.74925 | 4.28226  |
| O | -6.95797 | -6.34518 | 1.41734  |
| O | -6.00882 | -5.76407 | 3.28546  |
| C | -6.84328 | -6.42782 | 2.65686  |
| O | -5.08137 | -4.88517 | -1.15702 |
| O | -6.50356 | -3.39882 | -0.47853 |
| C | -6.45456 | -3.86753 | -2.78447 |
| H | -9.02129 | 0.52861  | 1.26086  |
| C | -7.78357 | -7.40080 | 3.44124  |
| H | -7.33560 | -8.39405 | 3.47054  |
| H | -8.75079 | -7.45301 | 2.94140  |
| H | -7.91956 | -7.03338 | 4.45837  |
| H | -5.98867 | -4.62276 | -3.41744 |
| H | -6.19283 | -2.87479 | -3.15058 |
| H | -7.53732 | -3.99021 | -2.80935 |
| C | 7.71269  | -6.03063 | 5.75988  |
| H | 8.49195  | -6.79263 | 5.77336  |
| H | 6.85097  | -6.38205 | 6.32735  |
| H | 8.09371  | -5.11329 | 6.20863  |
| C | 9.10562  | -2.37520 | -0.52392 |
| H | 8.59970  | -2.02880 | -1.42510 |
| H | 10.02129 | -2.89832 | -0.79956 |
| H | 9.35114  | -1.52044 | 0.10629  |
| H | -2.12077 | 2.86850  | -6.32735 |
| H | -1.76491 | 4.61103  | -6.25534 |
| H | -3.36721 | 4.00898  | -5.76711 |

### 2N4<sub>1...o</sub>M1

|    |          |          |          |
|----|----------|----------|----------|
| Cd | 10.95422 | 1.38526  | 0.01790  |
| H  | 12.65955 | 0.36701  | -3.21166 |
| O  | 13.44682 | 0.71066  | -2.69969 |
| O  | 13.11385 | 1.17361  | -0.50491 |
| O  | 10.98053 | 3.19940  | -1.35877 |
| O  | 10.47567 | -0.11735 | -1.81740 |
| O  | 10.46160 | 4.70752  | 0.22138  |
| C  | 13.82219 | 1.00098  | -1.52630 |
| C  | 15.31197 | 1.16082  | -1.35634 |
| C  | 10.52773 | 4.33356  | -0.95517 |
| C  | 10.01546 | 5.28250  | -2.01608 |
| H  | 10.80304 | -0.82933 | -1.19618 |
| H  | 9.51131  | -0.31367 | -1.99478 |
| I  | 7.22734  | -1.34728 | 1.38268  |
| I  | 6.68537  | 4.64668  | 1.35674  |
| H  | 2.75943  | 1.35394  | 0.89235  |
| O  | 8.46162  | 2.05988  | 2.73547  |
| O  | 8.79460  | 1.59693  | 0.54070  |
| O  | 10.92792 | -0.42886 | 1.39456  |
| O  | 11.43277 | 2.88789  | 1.85319  |

|    |           |          |          |
|----|-----------|----------|----------|
| O  | 11.44685  | -1.93699 | -0.18559 |
| N  | 4.07072   | -1.90621 | 2.04599  |
| C  | 5.99504   | 0.34411  | 1.35811  |
| O  | 3.29908   | 4.56766  | 0.20263  |
| C  | 5.81791   | 2.75938  | 1.29899  |
| O  | 2.15689   | -2.49620 | 0.08421  |
| C  | 8.08626   | 1.76955  | 1.56209  |
| O  | 3.12967   | 4.13638  | 2.37780  |
| C  | 6.59648   | 1.60972  | 1.39213  |
| C  | 3.83175   | 1.39429  | 1.08366  |
| O  | 2.91783   | -4.87165 | 3.38436  |
| N  | 3.92352   | -1.00565 | 1.11537  |
| H  | 3.33962   | -1.19344 | 0.32556  |
| C  | 11.38071  | -1.56303 | 0.99096  |
| C  | 4.43369   | 2.65120  | 1.15160  |
| C  | 11.89299  | -2.51197 | 2.05187  |
| C  | 2.31332   | -3.29578 | 0.98424  |
| C  | 3.37165   | -3.00372 | 2.03518  |
| C  | 3.64287   | -3.95172 | 3.14852  |
| C  | 4.88897   | -3.70765 | 3.96112  |
| H  | 5.75201   | -3.66137 | 3.29696  |
| H  | 4.79205   | -2.76417 | 4.49827  |
| H  | 5.02079   | -4.52141 | 4.67425  |
| C  | 4.58825   | 0.23834  | 1.22207  |
| C  | 3.58124   | 3.89166  | 1.16798  |
| C  | 1.53809   | -4.53392 | 1.01773  |
| H  | 1.01255   | -4.65913 | 0.07103  |
| H  | 2.21015   | -5.37746 | 1.17545  |
| H  | 0.81486   | -4.48749 | 1.83191  |
| H  | 2.48500   | 4.90071  | 2.36396  |
| H  | 11.10541  | 3.59987  | 1.23196  |
| H  | 12.39714  | 3.08420  | 2.03056  |
| H  | 9.24889   | 2.40352  | 3.24744  |
| Cd | -9.94971  | -1.69982 | -0.01789 |
| I  | -6.22282  | 1.03272  | -1.38268 |
| H  | -8.24438  | -2.71808 | -3.24744 |
| I  | -5.68085  | -4.96124 | -1.35674 |
| H  | -1.75491  | -1.66850 | -0.89235 |
| O  | -7.45711  | -2.37443 | -2.73546 |
| O  | -7.79008  | -1.91149 | -0.54069 |
| O  | -9.92340  | 0.11430  | -1.39456 |
| O  | -10.42826 | -3.20245 | -1.85319 |
| O  | -10.44234 | 1.62243  | 0.18560  |
| N  | -3.06621  | 1.59165  | -2.04598 |
| C  | -4.99053  | -0.65867 | -1.35811 |
| O  | -2.29457  | -4.88222 | -0.20262 |
| C  | -4.81339  | -3.07394 | -1.29899 |
| O  | -1.15237  | 2.18164  | -0.08420 |
| C  | -7.08175  | -2.08411 | -1.56209 |
| O  | -2.12515  | -4.45094 | -2.37780 |
| C  | -5.59196  | -1.92428 | -1.39212 |
| C  | -2.82723  | -1.70885 | -1.08366 |
| O  | -1.91331  | 4.55709  | -3.38436 |

|                              |           |          |          |
|------------------------------|-----------|----------|----------|
| N                            | -2.91902  | 0.69109  | -1.11536 |
| H                            | -2.33511  | 0.87888  | -0.32556 |
| C                            | -10.37619 | 1.24847  | -0.99095 |
| C                            | -3.42918  | -2.96576 | -1.15160 |
| C                            | -10.88847 | 2.19741  | -2.05187 |
| C                            | -1.30881  | 2.98122  | -0.98423 |
| C                            | -2.36713  | 2.68916  | -2.03517 |
| C                            | -2.63836  | 3.63716  | -3.14851 |
| C                            | -3.88445  | 3.39310  | -3.96111 |
| H                            | -4.74750  | 3.34681  | -3.29696 |
| H                            | -3.78753  | 2.44961  | -4.49827 |
| H                            | -4.01627  | 4.20685  | -4.67424 |
| C                            | -3.58374  | -0.55290 | -1.22207 |
| C                            | -2.57673  | -4.20622 | -1.16798 |
| C                            | -0.53358  | 4.21936  | -1.01773 |
| H                            | -0.00804  | 4.34457  | -0.07103 |
| H                            | -1.20563  | 5.06290  | -1.17545 |
| H                            | 0.18965   | 4.17293  | -1.83190 |
| H                            | -1.48049  | -5.21527 | -2.36396 |
| H                            | -10.10089 | -3.91443 | -1.23196 |
| H                            | -11.39262 | -3.39876 | -2.03056 |
| O                            | -12.44231 | -1.02522 | 2.69969  |
| O                            | -12.10934 | -1.48817 | 0.50491  |
| O                            | -9.97601  | -3.51396 | 1.35877  |
| O                            | -9.47116  | -0.19721 | 1.81740  |
| O                            | -9.45708  | -5.02208 | -0.22138 |
| C                            | -12.81767 | -1.31554 | 1.52630  |
| C                            | -14.30746 | -1.47538 | 1.35635  |
| C                            | -9.52322  | -4.64812 | 0.95517  |
| C                            | -9.01095  | -5.59705 | 2.01608  |
| H                            | -9.79852  | 0.51477  | 1.19618  |
| H                            | -8.50680  | -0.00088 | 1.99478  |
| H                            | -11.65504 | -0.68157 | 3.21166  |
| H                            | -14.53519 | -2.51075 | 1.10296  |
| H                            | -14.65417 | -0.82088 | 0.55667  |
| H                            | -14.80977 | -1.21003 | 2.28658  |
| H                            | -11.96109 | 2.05301  | -2.18111 |
| H                            | -10.37878 | 1.99789  | -2.99445 |
| H                            | -10.69462 | 3.22498  | -1.74437 |
| H                            | -8.31464  | -6.30422 | 1.56536  |
| H                            | -9.84891  | -6.14039 | 2.45275  |
| H                            | -8.50021  | -5.03023 | 2.79449  |
| H                            | 15.74160  | 1.56050  | -2.27490 |
| H                            | 15.75887  | 0.19089  | -1.13816 |
| H                            | 15.51221  | 1.84659  | -0.53313 |
| H                            | 8.95994   | 5.08399  | -2.20199 |
| H                            | 10.58024  | 5.13705  | -2.93692 |
| H                            | 10.13712  | 6.31013  | -1.67369 |
| H                            | 12.75834  | -3.05257 | 1.66849  |
| H                            | 11.10824  | -3.22149 | 2.31418  |
| H                            | 12.18145  | -1.94550 | 2.93728  |
| <b>2N4<sub>1...o</sub>M2</b> |           |          |          |
| Cd                           | 10.97967  | 1.38231  | 0.01789  |

|    |          |          |          |
|----|----------|----------|----------|
| H  | 12.68500 | 0.36406  | -3.21167 |
| O  | 13.47227 | 0.70771  | -2.69970 |
| O  | 13.13930 | 1.17066  | -0.50492 |
| O  | 11.00598 | 3.19644  | -1.35878 |
| O  | 10.50112 | -0.12030 | -1.81741 |
| O  | 10.48705 | 4.70456  | 0.22137  |
| C  | 13.84764 | 0.99803  | -1.52631 |
| C  | 15.33742 | 1.15787  | -1.35635 |
| C  | 10.55318 | 4.33060  | -0.95518 |
| C  | 10.04091 | 5.27954  | -2.01609 |
| H  | 10.82849 | -0.83228 | -1.19619 |
| H  | 9.53676  | -0.31662 | -1.99479 |
| I  | 7.25279  | -1.35023 | 1.38267  |
| H  | 6.29840  | 3.74644  | 1.32928  |
| I  | 1.79205  | 1.31361  | 0.71521  |
| O  | 8.48707  | 2.05692  | 2.73546  |
| O  | 8.82005  | 1.59398  | 0.54069  |
| O  | 10.95337 | -0.43181 | 1.39455  |
| O  | 11.45822 | 2.88493  | 1.85318  |
| O  | 11.47230 | -1.93994 | -0.18560 |
| N  | 4.09617  | -1.90916 | 2.04598  |
| C  | 6.02049  | 0.34116  | 1.35810  |
| O  | 3.32453  | 4.56470  | 0.20262  |
| C  | 5.84336  | 2.75642  | 1.29898  |
| O  | 2.18234  | -2.49915 | 0.08420  |
| C  | 8.11171  | 1.76659  | 1.56208  |
| O  | 3.15512  | 4.13342  | 2.37779  |
| C  | 6.62193  | 1.60676  | 1.39212  |
| C  | 3.85720  | 1.39133  | 1.08365  |
| O  | 2.94328  | -4.87460 | 3.38435  |
| N  | 3.94897  | -1.00860 | 1.11536  |
| H  | 3.36507  | -1.19639 | 0.32555  |
| C  | 11.40616 | -1.56598 | 0.99095  |
| C  | 4.45914  | 2.64824  | 1.15159  |
| C  | 11.91844 | -2.51492 | 2.05186  |
| C  | 2.33877  | -3.29873 | 0.98423  |
| C  | 3.39710  | -3.00667 | 2.03517  |
| C  | 3.66832  | -3.95467 | 3.14851  |
| C  | 4.91442  | -3.71060 | 3.96111  |
| H  | 5.77746  | -3.66432 | 3.29695  |
| H  | 4.81750  | -2.76712 | 4.49826  |
| H  | 5.04624  | -4.52436 | 4.67424  |
| C  | 4.61370  | 0.23539  | 1.22206  |
| C  | 3.60669  | 3.88870  | 1.16797  |
| C  | 1.56354  | -4.53687 | 1.01772  |
| H  | 1.03800  | -4.66208 | 0.07102  |
| H  | 2.23560  | -5.38041 | 1.17544  |
| H  | 0.84031  | -4.49044 | 1.83190  |
| H  | 2.51045  | 4.89775  | 2.36395  |
| H  | 11.13086 | 3.59691  | 1.23195  |
| H  | 12.42259 | 3.08124  | 2.03055  |
| H  | 9.27434  | 2.40056  | 3.24743  |
| Cd | -9.92426 | -1.70278 | -0.01789 |

|   |           |          |          |
|---|-----------|----------|----------|
| I | -6.19737  | 1.02976  | -1.38268 |
| H | -8.21893  | -2.72103 | -3.24744 |
| H | -5.24298  | -4.06691 | -1.32929 |
| I | -0.73664  | -1.63408 | -0.71522 |
| O | -7.43166  | -2.37738 | -2.73546 |
| O | -7.76463  | -1.91445 | -0.54069 |
| O | -9.89795  | 0.11134  | -1.39456 |
| O | -10.40281 | -3.20541 | -1.85319 |
| O | -10.41689 | 1.61947  | 0.18560  |
| N | -3.04076  | 1.58869  | -2.04598 |
| C | -4.96508  | -0.66163 | -1.35811 |
| O | -2.26912  | -4.88517 | -0.20262 |
| C | -4.78794  | -3.07689 | -1.29899 |
| O | -1.12692  | 2.17868  | -0.08420 |
| C | -7.05630  | -2.08706 | -1.56209 |
| O | -2.09970  | -4.45389 | -2.37780 |
| C | -5.56651  | -1.92724 | -1.39212 |
| C | -2.80178  | -1.71180 | -1.08366 |
| O | -1.88786  | 4.55413  | -3.38436 |
| N | -2.89357  | 0.68813  | -1.11536 |
| H | -2.30966  | 0.87592  | -0.32556 |
| C | -10.35074 | 1.24551  | -0.99095 |
| C | -3.40373  | -2.96871 | -1.15160 |
| C | -10.86302 | 2.19445  | -2.05187 |
| C | -1.28336  | 2.97826  | -0.98423 |
| C | -2.34168  | 2.68620  | -2.03517 |
| C | -2.61291  | 3.63420  | -3.14851 |
| C | -3.85900  | 3.39014  | -3.96111 |
| H | -4.72205  | 3.34385  | -3.29696 |
| H | -3.76208  | 2.44665  | -4.49827 |
| H | -3.99082  | 4.20389  | -4.67424 |
| C | -3.55829  | -0.55586 | -1.22207 |
| C | -2.55128  | -4.20917 | -1.16798 |
| C | -0.50813  | 4.21640  | -1.01773 |
| H | 0.01741   | 4.34161  | -0.07103 |
| H | -1.18018  | 5.05994  | -1.17545 |
| H | 0.21510   | 4.16997  | -1.83190 |
| H | -1.45504  | -5.21822 | -2.36396 |
| H | -10.07544 | -3.91738 | -1.23196 |
| H | -11.36717 | -3.40171 | -2.03056 |
| O | -12.41686 | -1.02818 | 2.69969  |
| O | -12.08389 | -1.49113 | 0.50491  |
| O | -9.95056  | -3.51691 | 1.35877  |
| O | -9.44571  | -0.20017 | 1.81740  |
| O | -9.43163  | -5.02503 | -0.22138 |
| C | -12.79222 | -1.31850 | 1.52630  |
| C | -14.28201 | -1.47834 | 1.35635  |
| C | -9.49777  | -4.65107 | 0.95517  |
| C | -8.98550  | -5.60000 | 2.01608  |
| H | -9.77307  | 0.51181  | 1.19618  |
| H | -8.48135  | -0.00384 | 1.99478  |
| H | -11.62959 | -0.68453 | 3.21166  |
| H | -14.50974 | -2.51371 | 1.10296  |



|   |           |          |          |
|---|-----------|----------|----------|
| H | -14.62872 | -0.82384 | 0.55667  |
| H | -14.78432 | -1.21299 | 2.28658  |
| H | -11.93564 | 2.05005  | -2.18111 |
| H | -10.35333 | 1.99493  | -2.99445 |
| H | -10.66917 | 3.22202  | -1.74437 |
| H | -8.28919  | -6.30717 | 1.56536  |
| H | -9.82346  | -6.14334 | 2.45275  |
| H | -8.47476  | -5.03318 | 2.79449  |
| H | 15.76705  | 1.55755  | -2.27491 |
| H | 15.78432  | 0.18794  | -1.13817 |
| H | 15.53766  | 1.84364  | -0.53314 |
| H | 8.98539   | 5.08103  | -2.20200 |
| H | 10.60569  | 5.13409  | -2.93693 |
| H | 10.16257  | 6.30717  | -1.67370 |
| H | 12.78379  | -3.05552 | 1.66848  |
| H | 11.13369  | -3.22444 | 2.31417  |
| H | 12.20690  | -1.94845 | 2.93727  |
